# Supplementary material for: Metal–organic frameworks with open metal sites act as efficient heterogeneous catalysts for Knoevenagel condensation and the Chan–Lam coupling reaction
Source: Royal Society of Chemistry journal article supplement (doi:10.1039/d3ce00663h), 2023-01-01
Supplement: d3ce00663h1.pdf [file d3ce00663h1.pdf]

## **Supporting Information**

# **Metal-organic frameworks with open metal sites act as efficient heterogeneous catalysts for Knoevenagel condensation and Chan-Lam coupling reaction**

*Anindita Goswami, Prantik Dutta and Kumar Biradha\**

Department of Chemistry, Indian Institute of Technology Kharagpur, 721302 Kharagpur, India E-mail: [kbiradha@chem.iitkgp.ernet.in](mailto:kbiradha@chem.iitkgp.ernet.in); Fax: +91-3222-282252; Tel: +91-3222-283346.

CCDC Numbers for the crystal structures are CCDC 2278988, 2278989

## **Contents:**

**Section S1: Pertinent crystallographic parameter for Cd-CDA-MOF and Cu-CDA-MOF.**

**Section S2: Thermogravimetric Analyses**

**Section S3: FESEM analysis of Cd-CDA-MOF and Cu-CDA-MOF.**

**Section S4: A comparison of CO<sub>2</sub> uptake capacity of Cu-CDA-MOF with some recently reported MOFs.**

**Section S5: Knoevenagel Condensation Reaction Catalyzed by Cd-CDA-MOF**

**Section S6: Chan-Lam Coupling Reaction Catalyzed by Cu-CDA-MOF**

**Section S7: Representative <sup>1</sup>H and <sup>13</sup>C NMR Spectra**

**Section S8: Comparison Table for Catalytic Activity and Conversion Efficiency of Cd-CDA-MOF and Cu-CDA-MOF with the recently reported MOF catalysts**

**Section S1:**

**Table S1.** Pertinent Crystallographic Parameters for **Cd-CDA-MOF** and **Cu-CDA-MOF**

|                                                | <b>Cd-CDA-MOF</b>                        | <b>Cu-CDA-MOF</b>                                 |
|------------------------------------------------|------------------------------------------|---------------------------------------------------|
| CCDC Number                                    | 2278988                                  | 2278989                                           |
| Formula                                        | $C_{52}H_{84}Cd_3N_6O_{36}$ <sup>§</sup> | $C_{312}H_{276}Cu_{24}N_{30}O_{144}$ <sup>§</sup> |
| Mol. Wt.                                       | 1706.45                                  | 8274.57                                           |
| T (k)                                          | 300(2)                                   | 120(2)                                            |
| Crystal System                                 | Monoclinic                               | Tetragonal                                        |
| Space group                                    | C2/c                                     | I4/m                                              |
| a (Å)                                          | 36.833(5)                                | 30.4107(13)                                       |
| b (Å)                                          | 10.2950(14)                              | 30.4107(13)                                       |
| c (Å)                                          | 20.105(3)                                | 30.414                                            |
| $\alpha$ (°)                                   | 90                                       | 90                                                |
| $\beta$ (°)                                    | 102.065(6)                               | 90                                                |
| $\gamma$ (°)                                   | 90                                       | 90                                                |
| V (Å <sup>3</sup> )                            | 7455.3(17)                               | 28127(2)                                          |
| Z                                              | 4                                        | 2                                                 |
| D (g/cm <sup>3</sup> )                         | 1.492                                    | 1.009                                             |
| R <sub>1</sub> [I > 2 $\sigma$ (I)]            | 0.0896                                   | 0.0585                                            |
| wR <sub>2</sub> (on F <sup>2</sup> , all data) | 0.2476                                   | 0.2118                                            |

<sup>§</sup> The structural formulae for Cd-CDA-MOF and Cu-CDA-MOF are ( $\{[Cd_2(CDA)_2] \cdot Cd(H_2O)_6 \cdot (NH_2Me)_2 \cdot 10 H_2O\}_n$ ) and ( $\{[Cu_{24}(CDA)_{12}(H_2O)_{16}(DMA)_8] \cdot (solv.)_x\}_n$ ) respectively. (solv)<sub>x</sub> is disordered DMA and/or H<sub>2</sub>O

## Section S2: Thermogravimetric Analyses

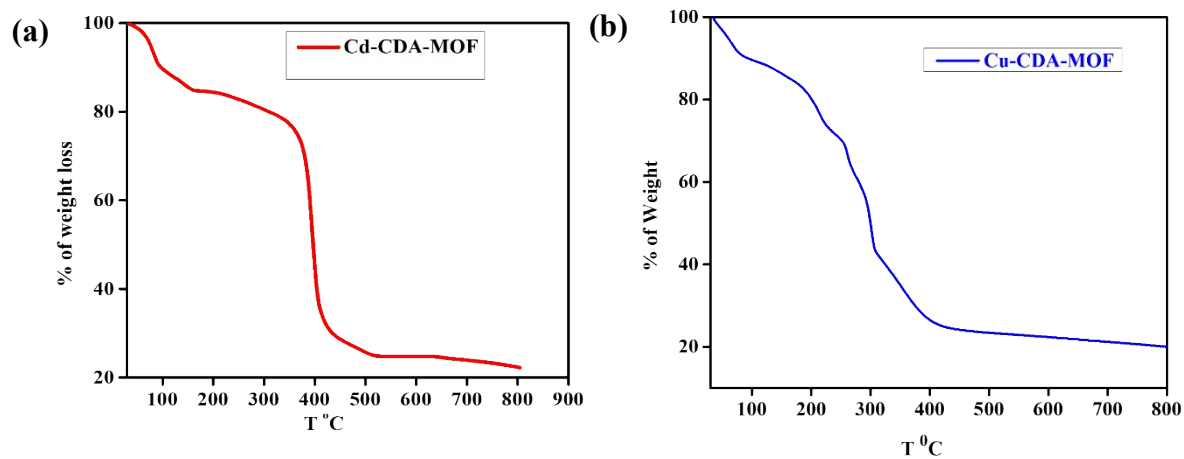

Figure S1. Thermogravimetric Analyses: (a) Cd-CDA-MOF; (b) Cu-CDA-MOF.

## Section S3: FESEM analysis of Cd-CDA-MOF and Cu-CDA-MOF.

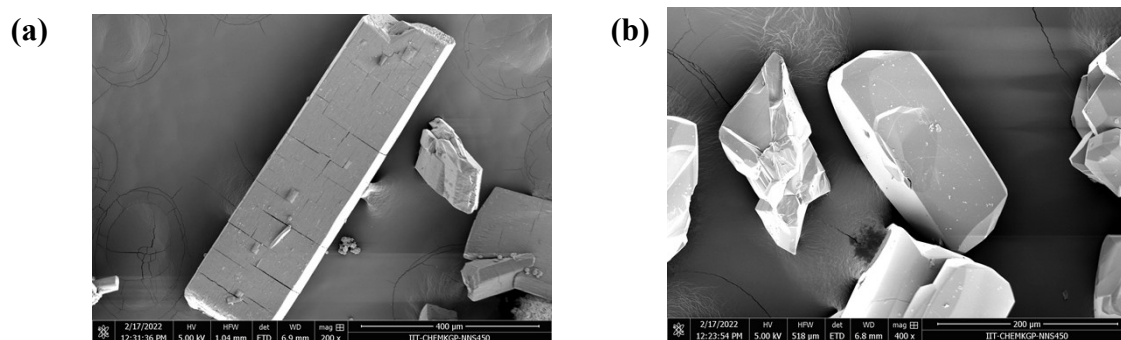

Figure S2. FESEM Analyses of (a) Cd-CDA-MOF; and (b) Cu-CDA-MOF.



**Section S4: A comparison of CO<sub>2</sub> uptake capacity of Cu-CDA-MOF with some recently reported MOFs.**

**Table S2.** Comparison table of CO<sub>2</sub> uptake capacity of Cu-CDA-MOF

| <b>Compounds (MOFs)</b> | <b>CO<sub>2</sub> uptake capacity</b> | <b>Condition</b> | <b>References</b>                                                  |
|-------------------------|---------------------------------------|------------------|--------------------------------------------------------------------|
| <b>SNU-5</b>            | 38.5 %                                | 273 K            | <i>Angew. Chem., Int. Ed.</i> <b>2008</b> , <i>47</i> , 7741–7745. |
| <b>Cu-MOF</b>           | 162.2 cm <sup>3</sup> g <sup>-1</sup> | 273 K            | <i>Chem. Mater.</i> <b>2017</b> , <i>29</i> , 9256-9261.           |
| <b>Cu-MOF</b>           | 160.8 cm <sup>3</sup> g <sup>-1</sup> | 273 K            | <i>J. Am. Chem. Soc.</i> <b>2016</b> , <i>138</i> , 2142-2145.     |
| <b>Cu-eea-1</b>         | 66.9 cm <sup>3</sup> g <sup>-1</sup>  | 298 K            | <i>Chem. Eur. J.</i> <b>2019</b> , <i>25</i> , 14500-14505.        |
| <b>Cu-eea-2</b>         | 60 cm <sup>3</sup> g <sup>-1</sup>    | 298 K            | <i>Chem. Eur. J.</i> <b>2019</b> , <i>25</i> , 14500-14505.        |
| <b>Cu-eea-3</b>         | 81.7 cm <sup>3</sup> g <sup>-1</sup>  | 298 K            | <i>Chem. Eur. J.</i> <b>2019</b> , <i>25</i> , 14500-14505.        |
| <b>UTSA-74a</b>         | 90 cm <sup>3</sup> g <sup>-1</sup>    | 298 K            | <i>J. Am. Chem. Soc.</i> <b>2016</b> , <i>138</i> , 5678-5684.     |
| <b>Mn-act</b>           | 43.5 cm <sup>3</sup> g <sup>-1</sup>  | 298 K            | <i>Chem. Eur. J.</i> <b>2016</b> , <i>22</i> , 7444-7451.          |
| <b>Co-act</b>           | 42.0 cm <sup>3</sup> g <sup>-1</sup>  | 298 K            | <i>Chem. Eur. J.</i> <b>2016</b> , <i>22</i> , 7444-7451.          |
| <b>Ni-act</b>           | 60.18 cm <sup>3</sup> g <sup>-1</sup> | 298 K            | <i>Chem. Eur. J.</i> <b>2016</b> , <i>22</i> , 7444-7451.          |
| <b>Zn-act</b>           | 31.4 cm <sup>3</sup> g <sup>-1</sup>  | 298 K            | <i>Chem. Eur. J.</i> <b>2016</b> , <i>22</i> , 7444-7451.          |
| <b>Cd-MOF</b>           | 16.8 cm <sup>3</sup> g <sup>-1</sup>  | 298 K            | <i>J. Solid State Chem.</i> <b>2021</b> , <i>295</i> , 121890.     |
| <b>Cu-CDA-MOF</b>       | 45 cm <sup>3</sup> g <sup>-1</sup>    | 298 K            | <b>This work</b>                                                   |

## Section S5: Knoevenagel Condensation Reaction Catalyzed by Cd-CDA-MOF

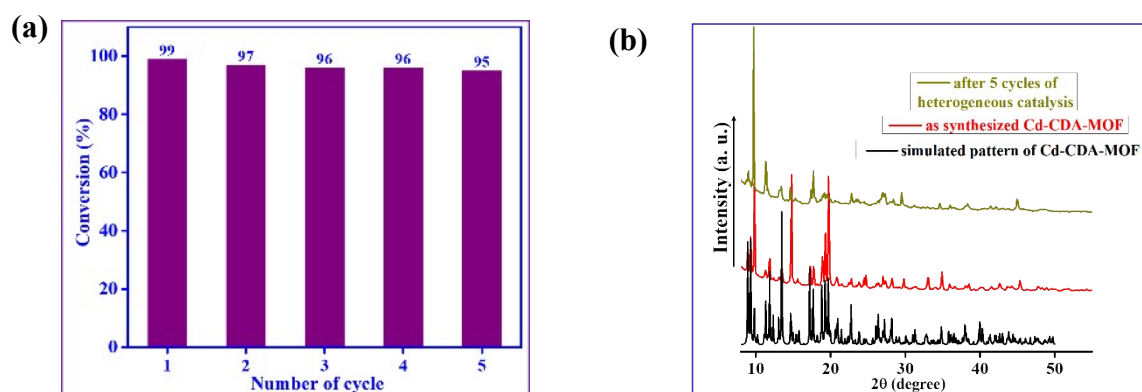

**Figure S3.** (a) Recyclability experiment of Cd-CDA-MOF catalyst for Knoevenagel condensation reaction; (b) comparison of PXRD pattern after successive five cycles of reactions.

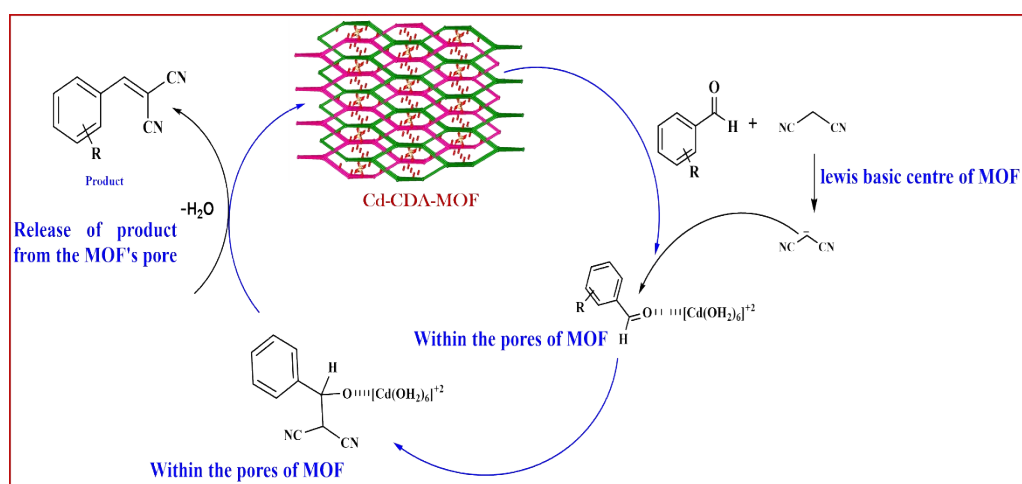

**Scheme S1.** A schematic for plausible mechanism of Knoevenagel condensation reaction catalyzed by Cd-CDA-MOF.

## Section S6: Chan-Lam Coupling Reaction Catalyzed by Cu-CDA-MOF

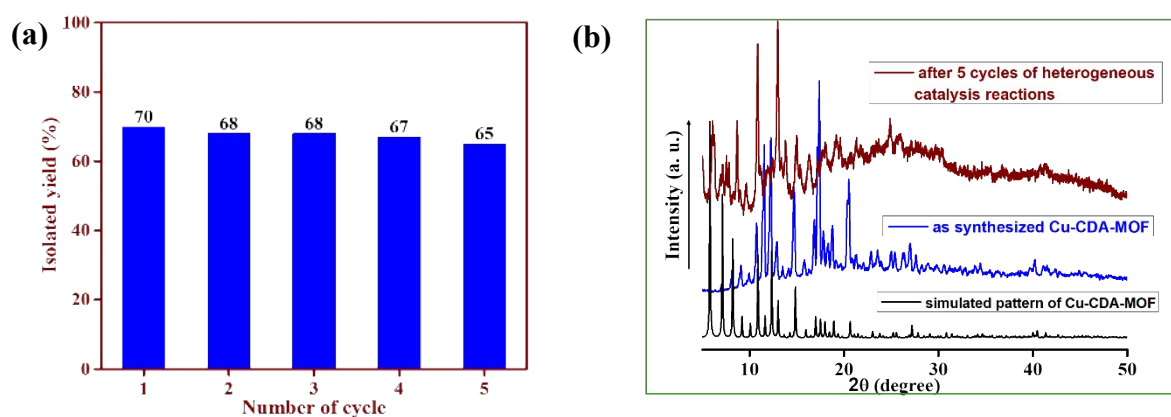

**Figure S4.** (a) Recyclability experiment of Cu-CDA-MOF catalyst for Chan-Lam coupling reaction; (b) comparison of PXRD pattern after successive five cycles of reactions.

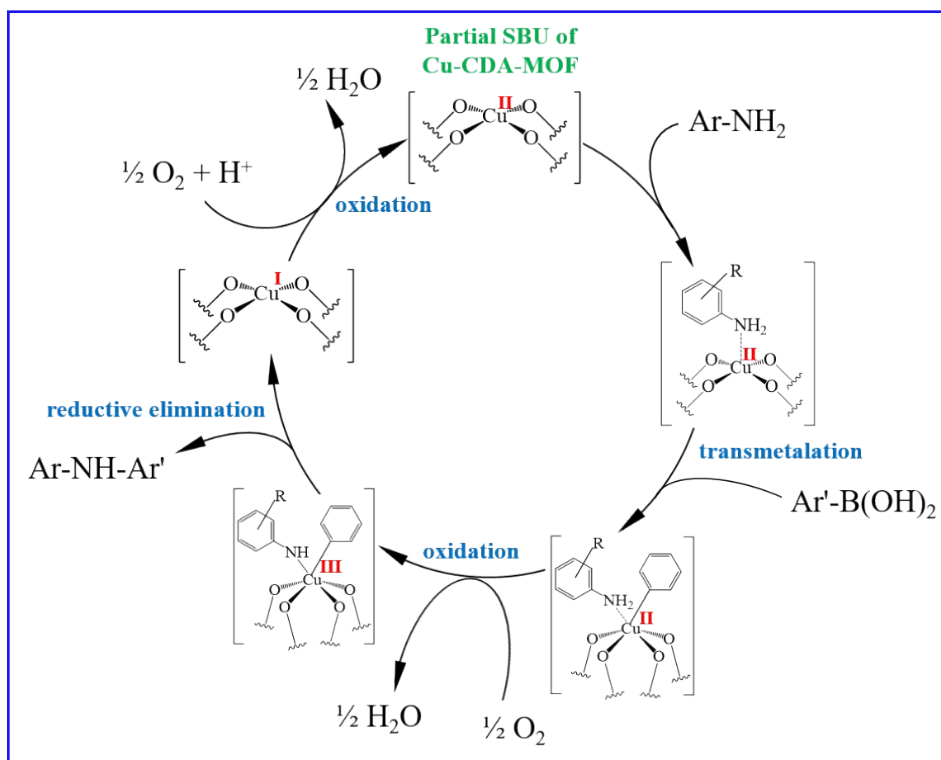

**Scheme S2.** A schematic for plausible mechanism of Chan-Lam coupling reaction catalyzed by **Cu-CDA-MOF**.

## Section S7: Representative $^1\text{H}$ and $^{13}\text{C}$ NMR Spectra

### Section S7a: Representative $^1\text{H}$ and $^{13}\text{C}$ NMR Spectra of Knoevenagel Condensation Products

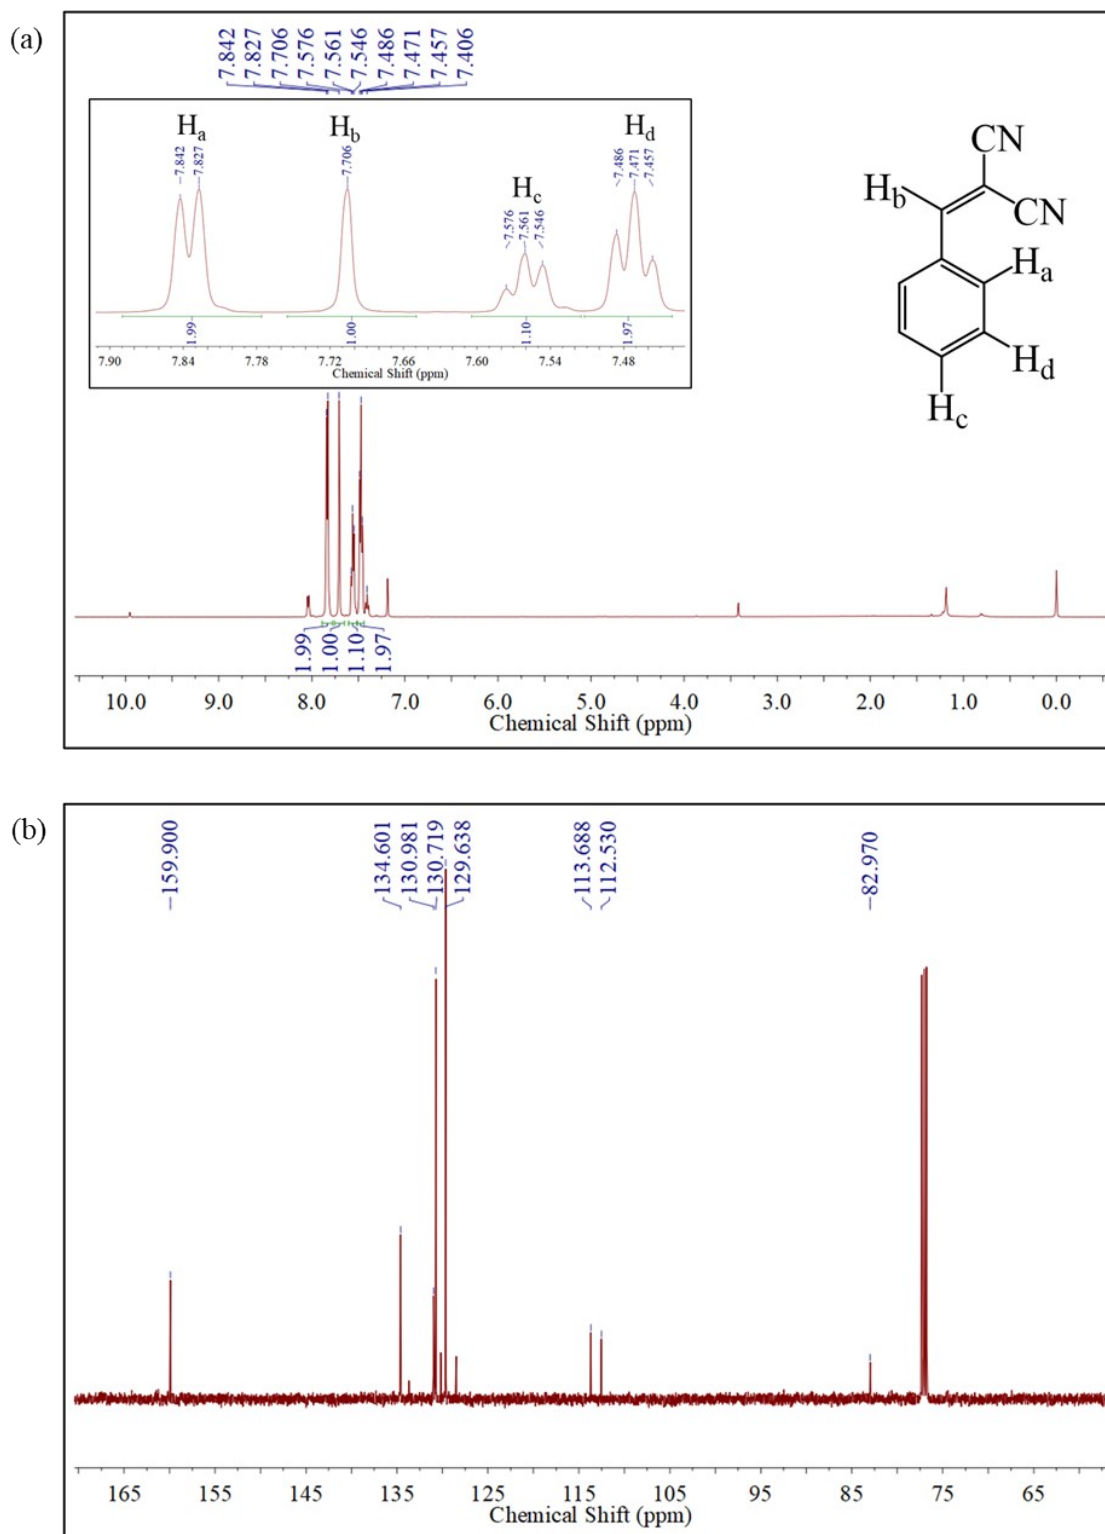

**Figure S5.** (a)  $^1\text{H}$  NMR ( $\text{CDCl}_3$ , 500 MHz) and (b)  $^{13}\text{C}$  ( $\text{CDCl}_3$ , 500 MHz) of Knoevenagel Condensation product of benzaldehyde and malononitrile catalyzed by Cd-CDA-MOF



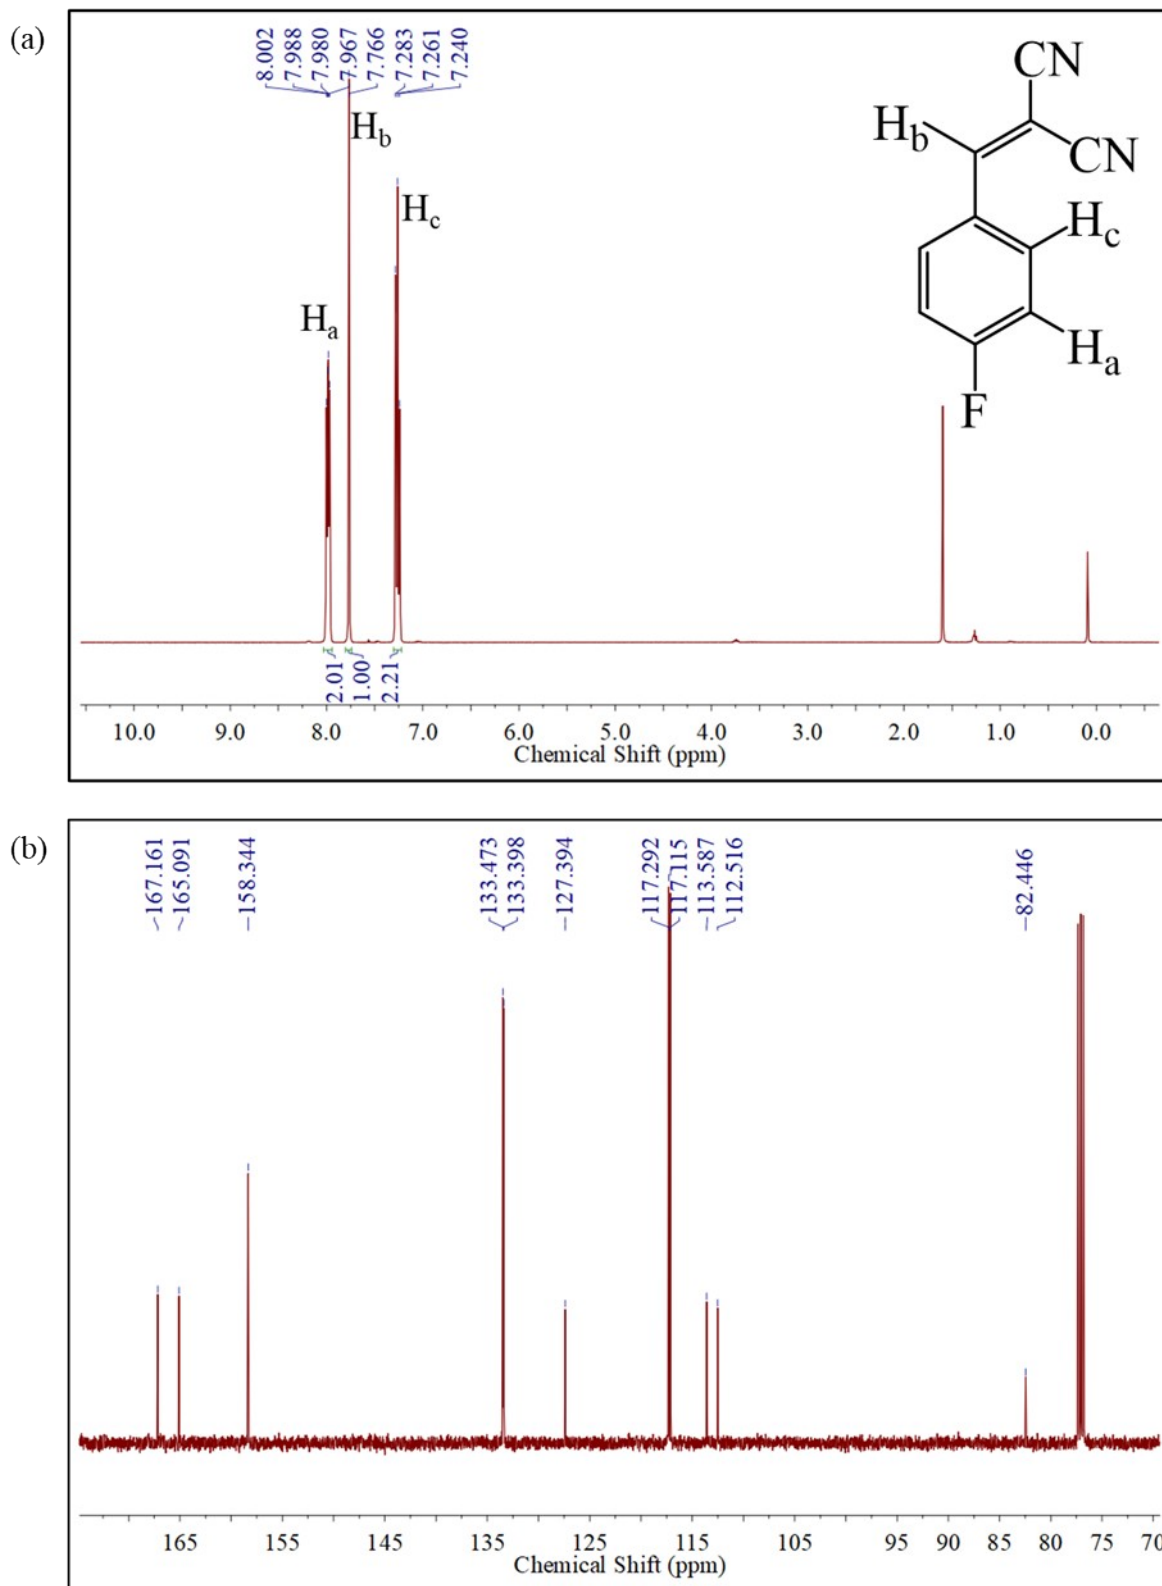

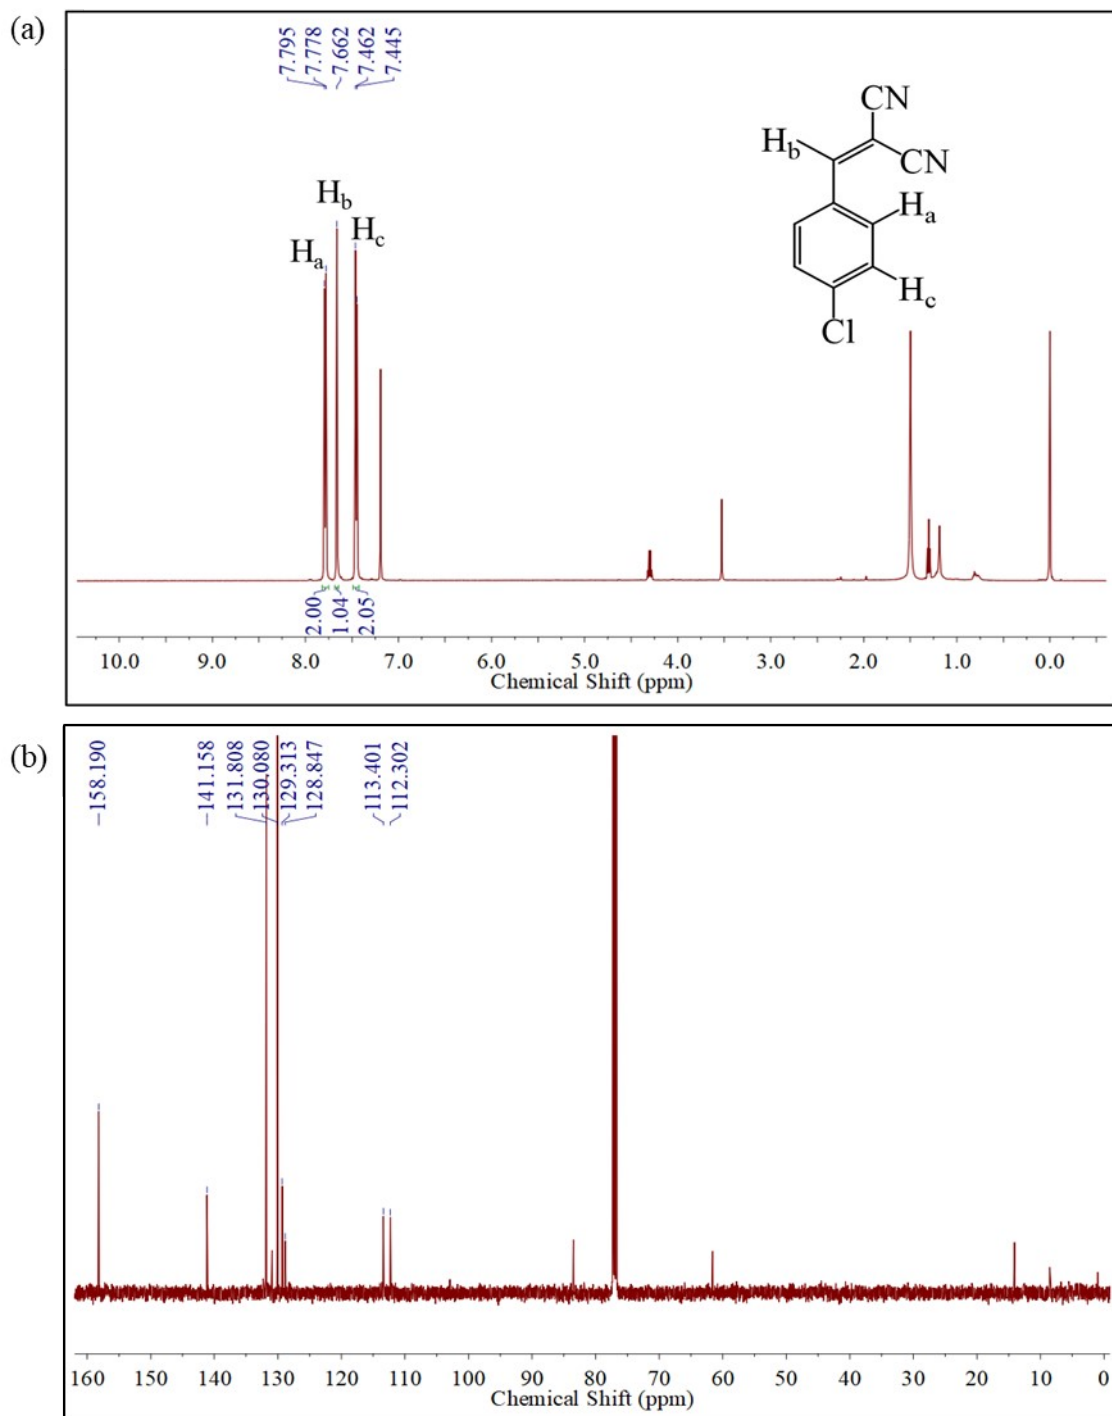

**Figure S7.** (a)  $^1\text{H}$  NMR (CDCl<sub>3</sub>, 500 MHz) and (b)  $^{13}\text{C}$  (CDCl<sub>3</sub>, 500 MHz) of Knoevenagel Condensation product of 4-chlorobenzaldehyde and malononitrile catalyzed by **Cd-CDA-MOF**.

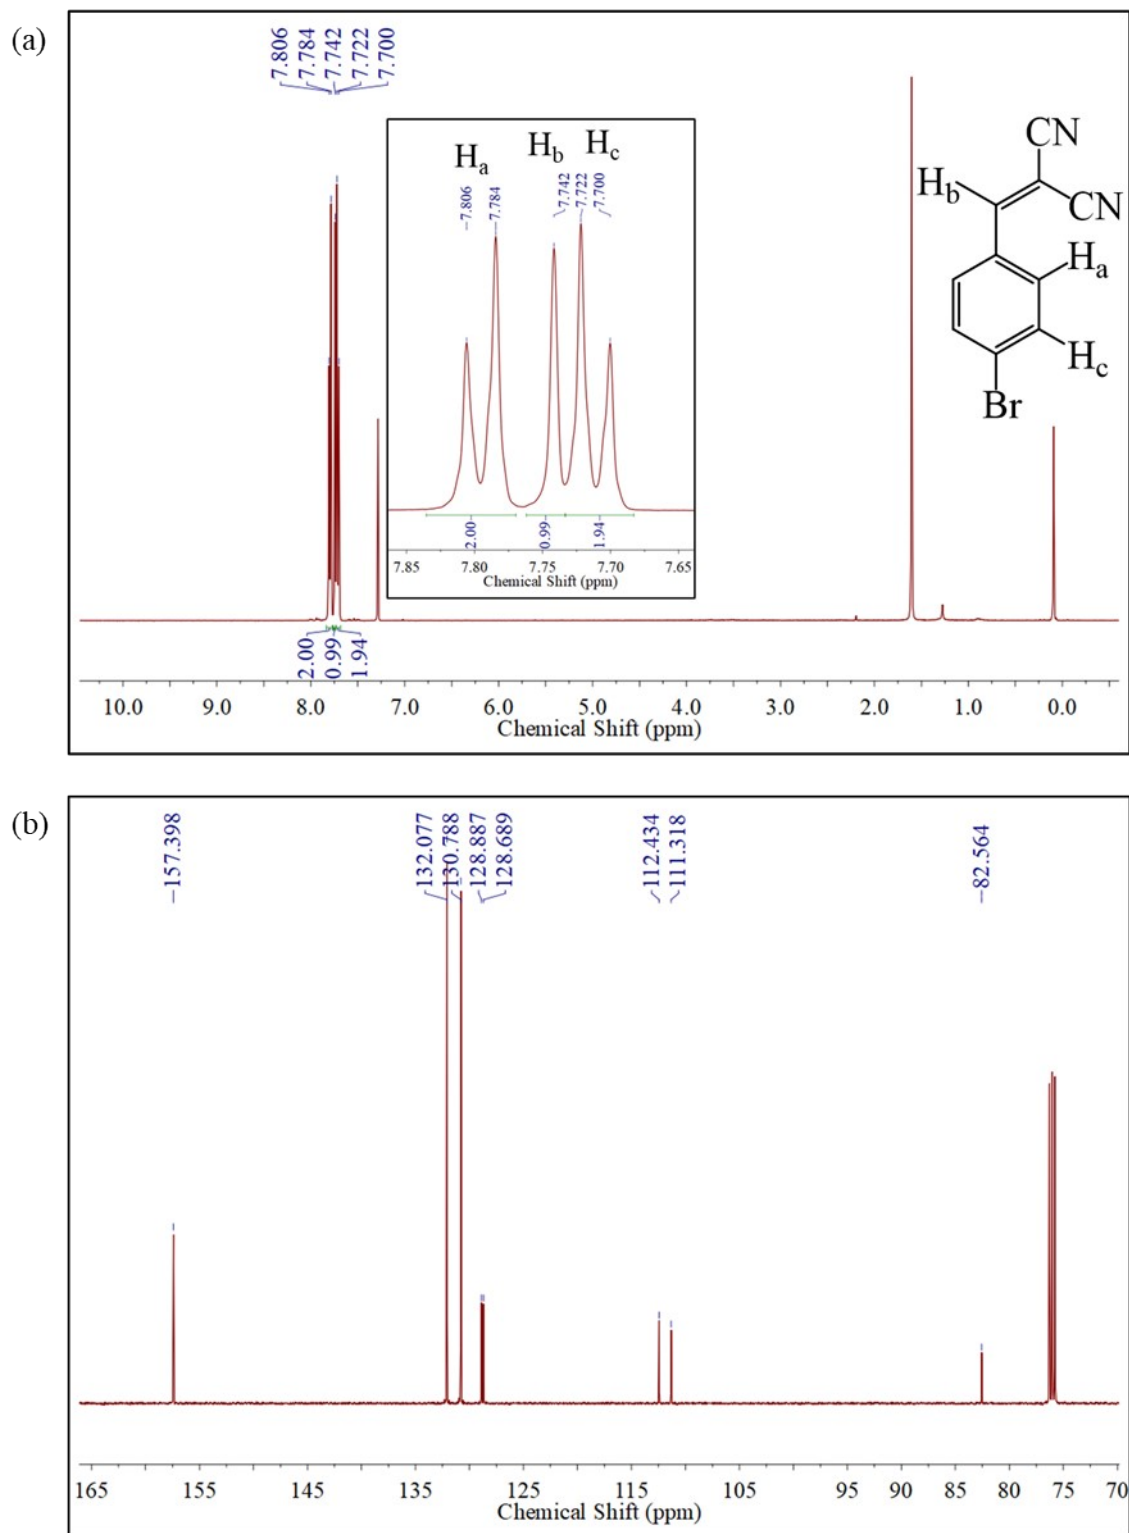

**Figure S8.** (a)  $^1\text{H}$  NMR ( $\text{CDCl}_3$ , 400 MHz) and (b)  $^{13}\text{C}$  ( $\text{CDCl}_3$ , 500 MHz) of Knoevenagel Condensation product of 4-bromobenzaldehyde and malononitrile catalyzed by **Cd-CDA-MOF**.

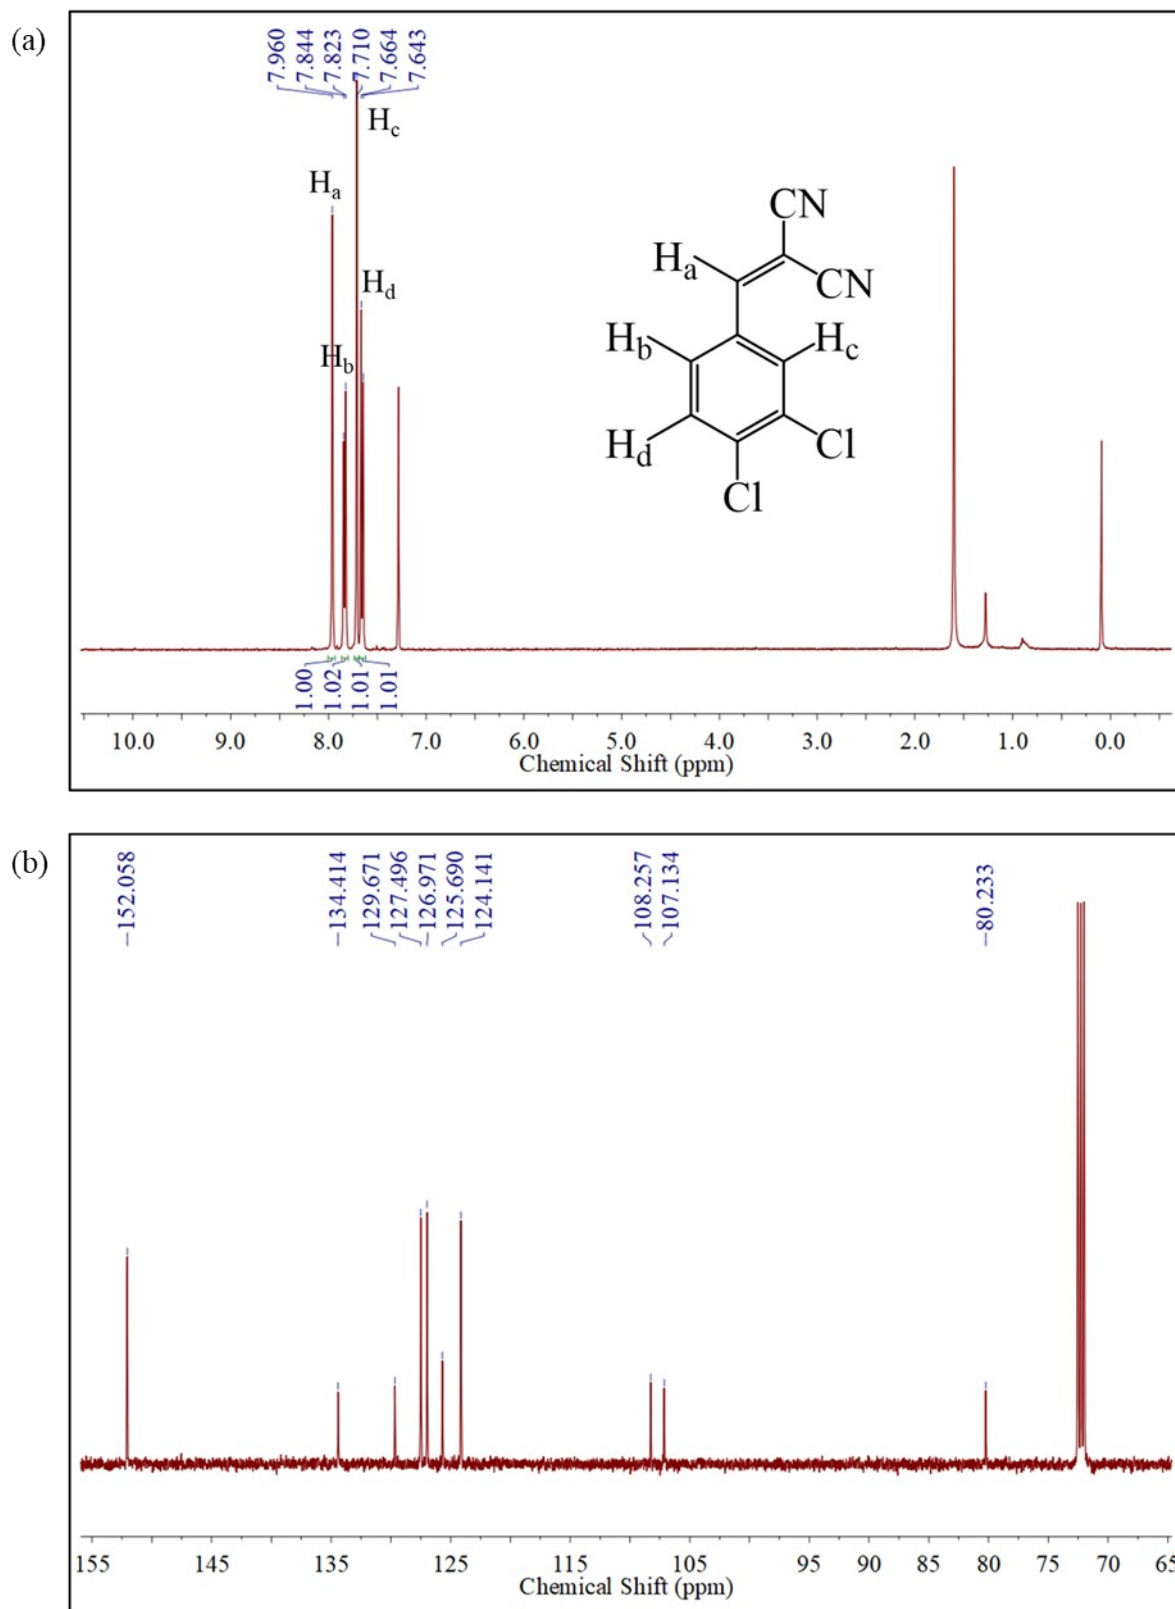

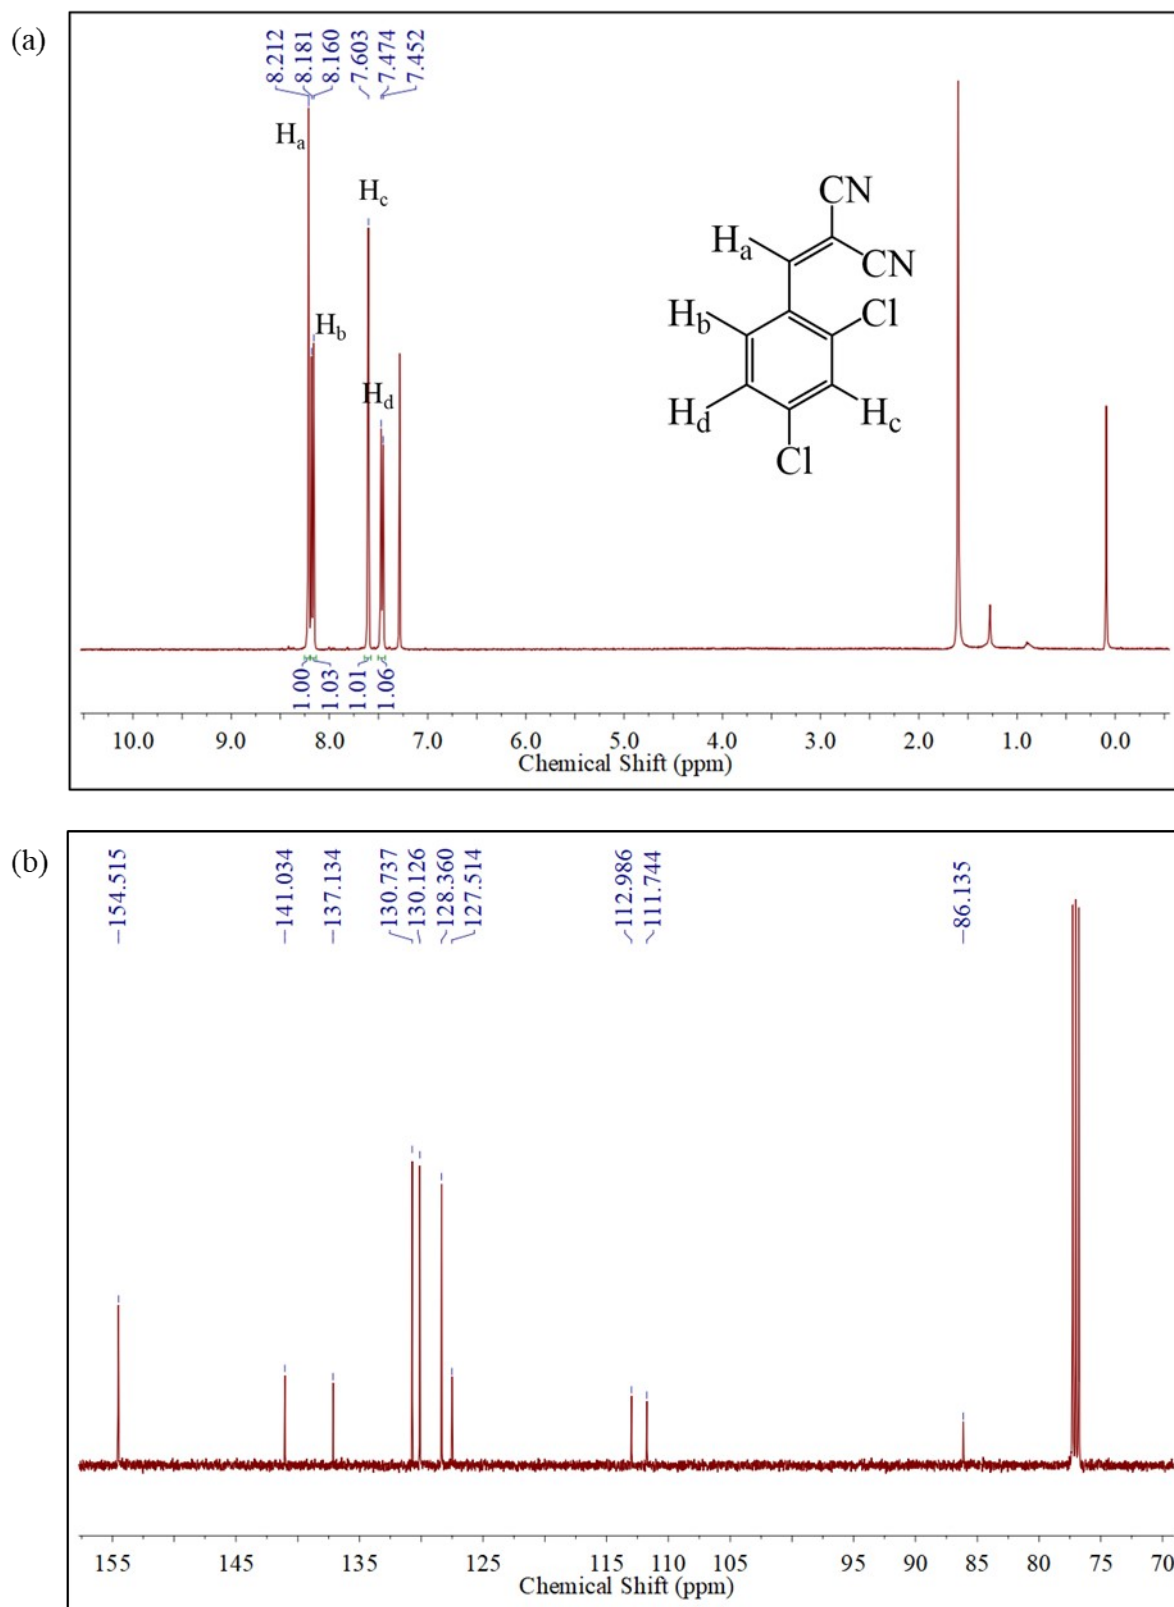

**Figure S10.** (a)  $^1\text{H}$  NMR ( $\text{CDCl}_3$ , 400 MHz) and (b)  $^{13}\text{C}$  ( $\text{CDCl}_3$ , 500 MHz) of Knoevenagel Condensation product of 2,4-dichlorobenzaldehyde and malononitrile catalyzed by **Cd-CDA-MOF**.

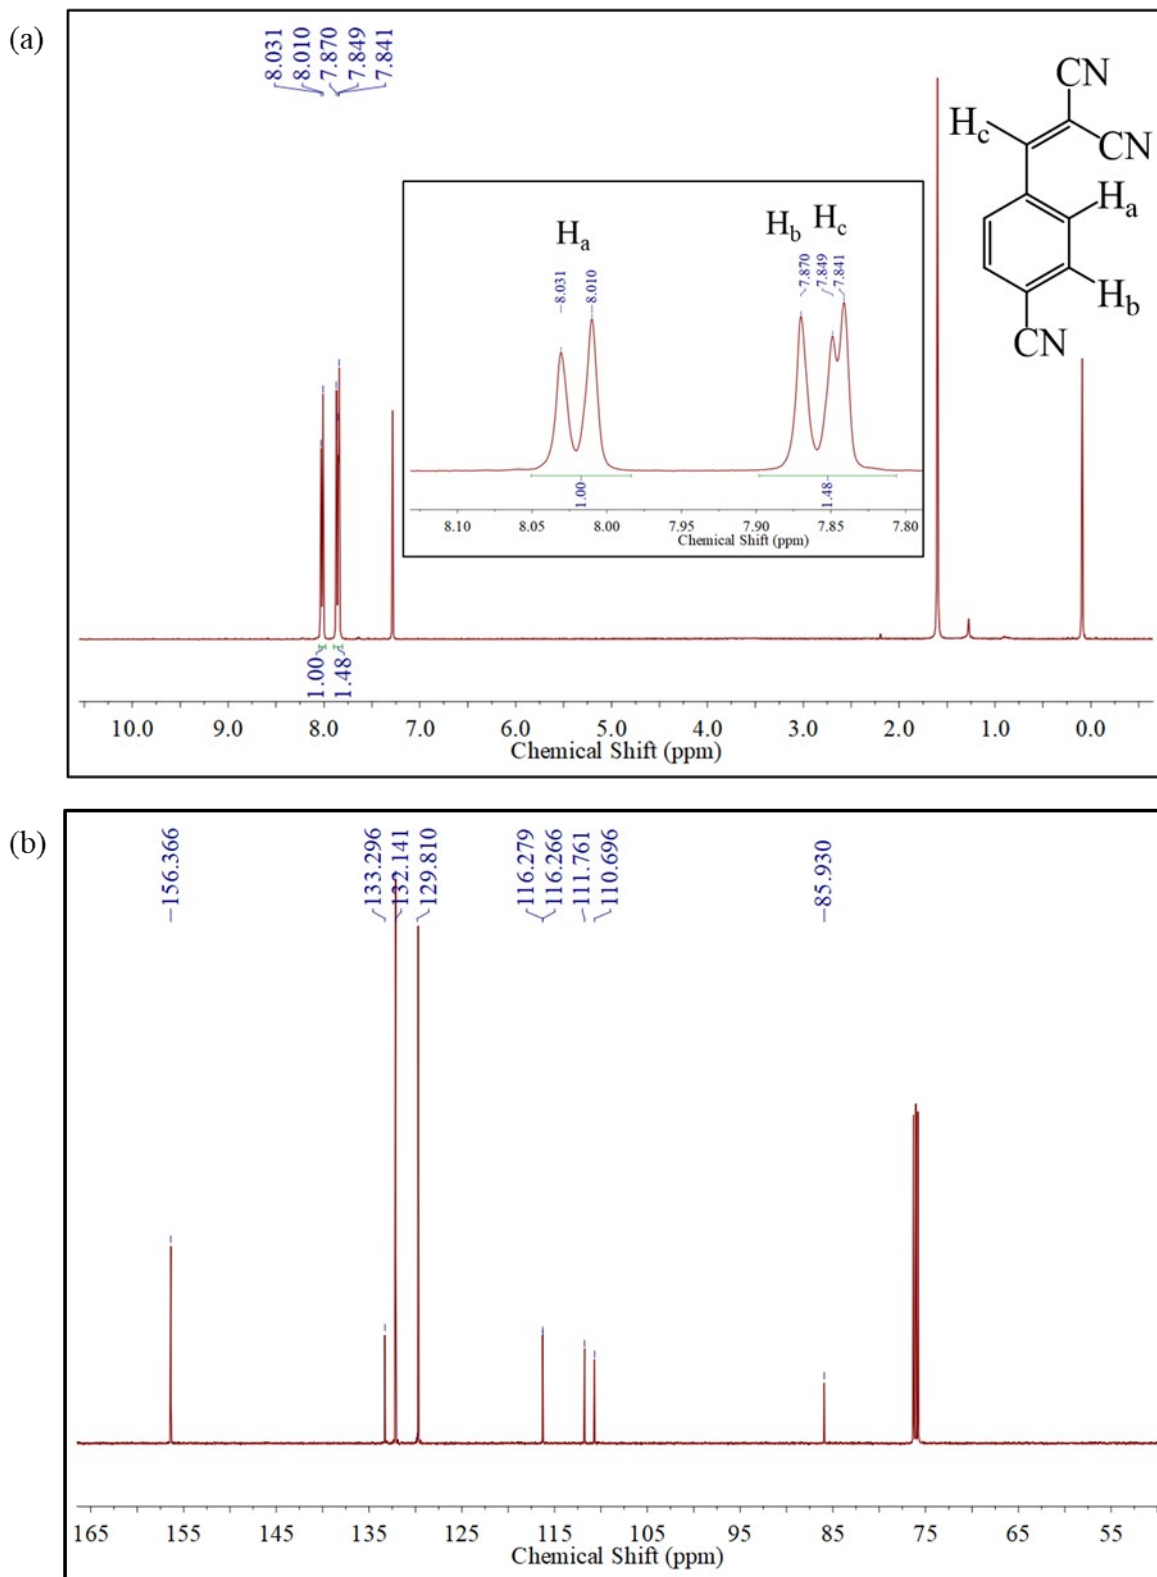

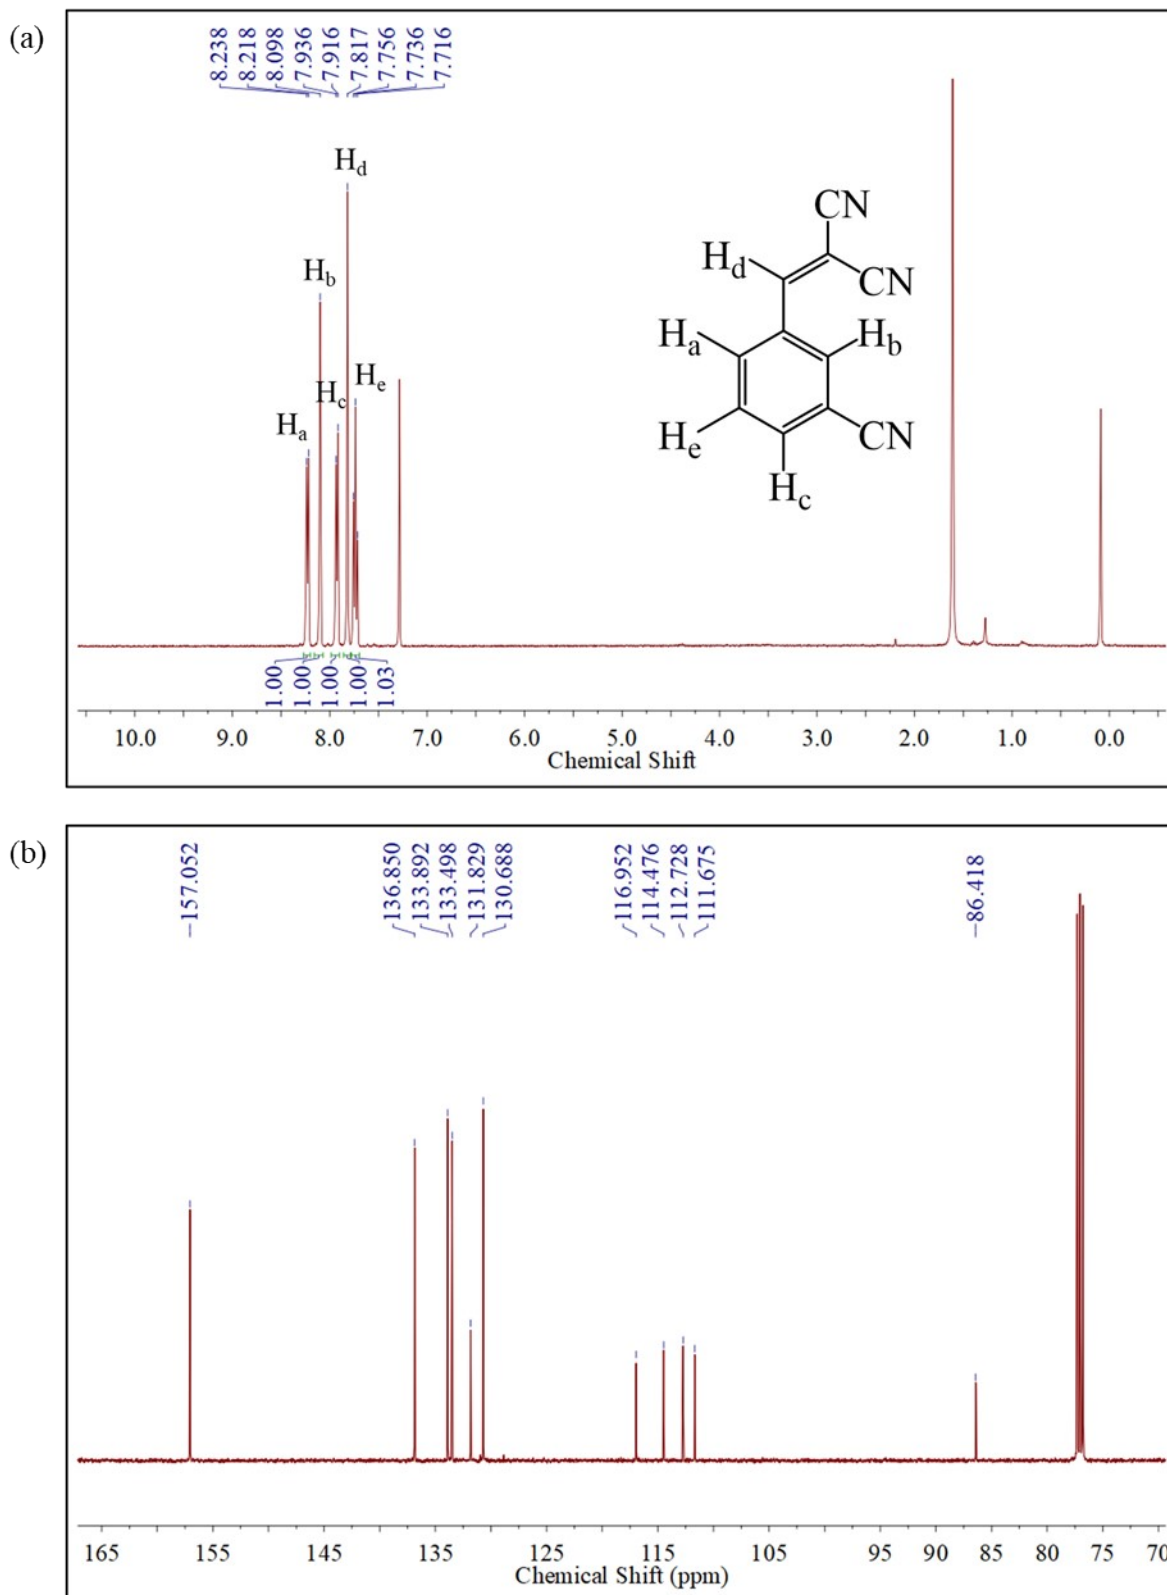

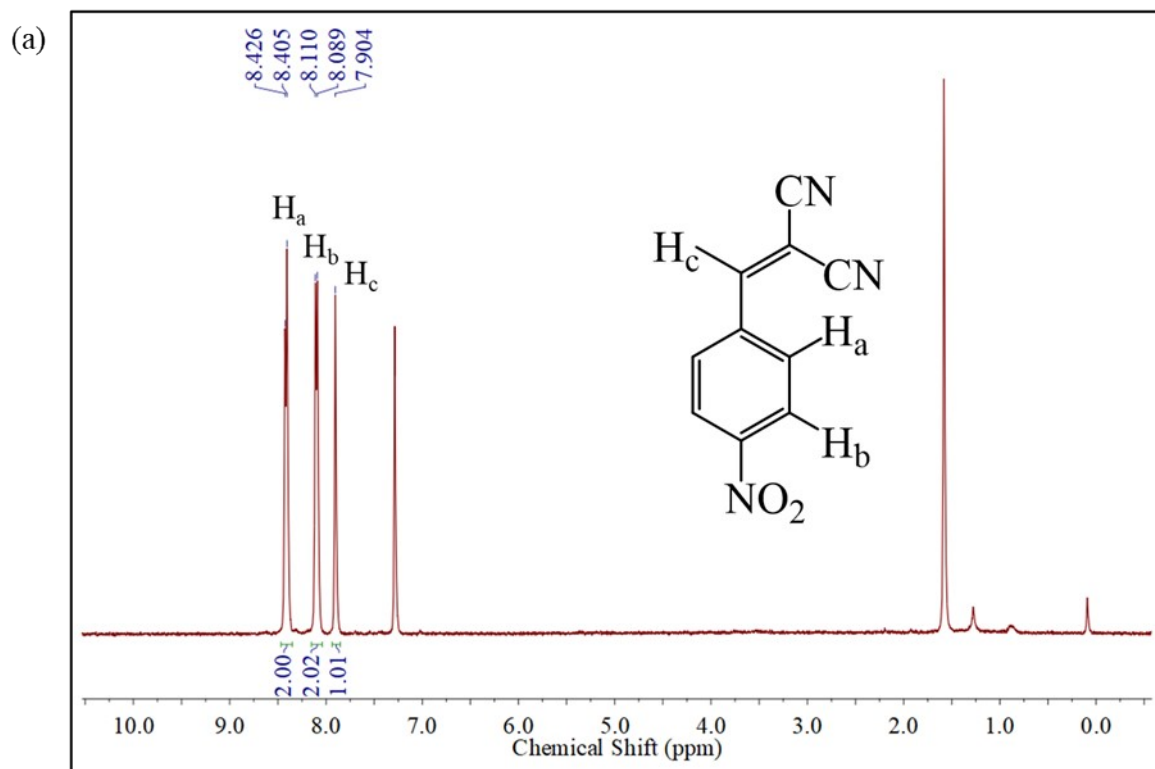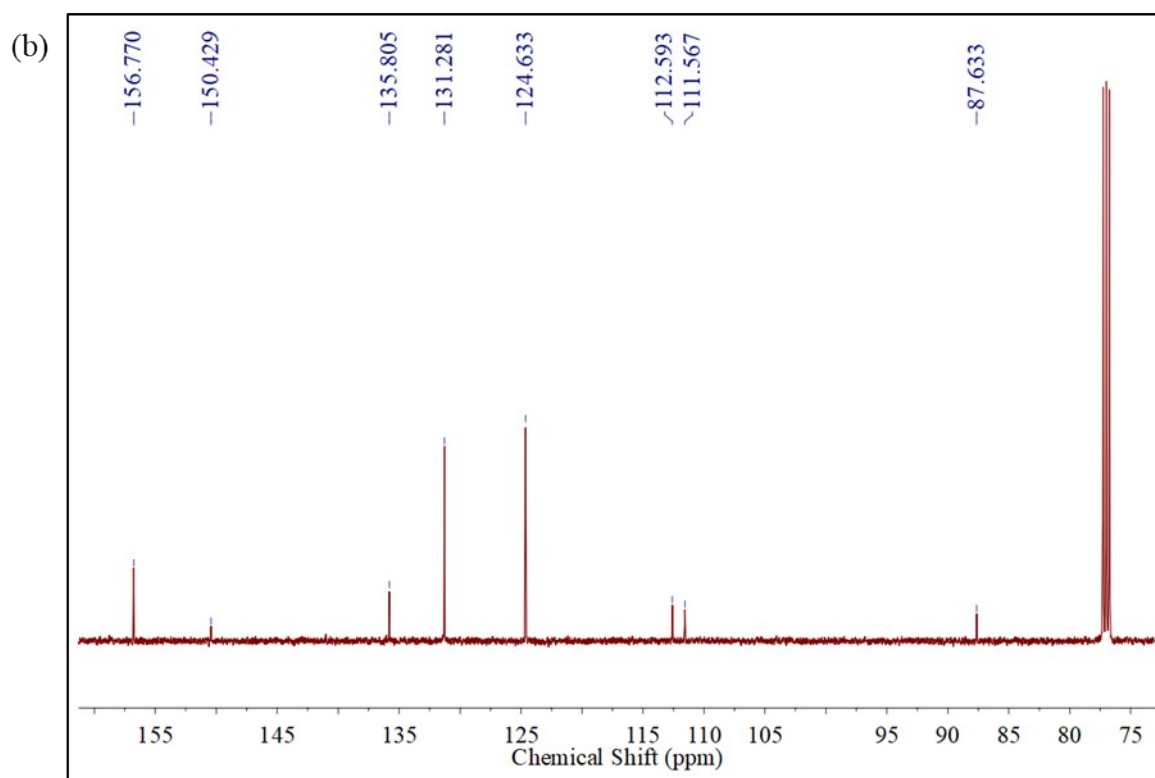

**Figure S13.** (a)  $^1H$  NMR ( $CDCl_3$ , 400 MHz) and (b)  $^{13}C$  ( $CDCl_3$ , 500 MHz) of Knoevenagel Condensation product of 4-nitrobenzaldehyde and malononitrile catalyzed by **Cd-CDA-MOF**.



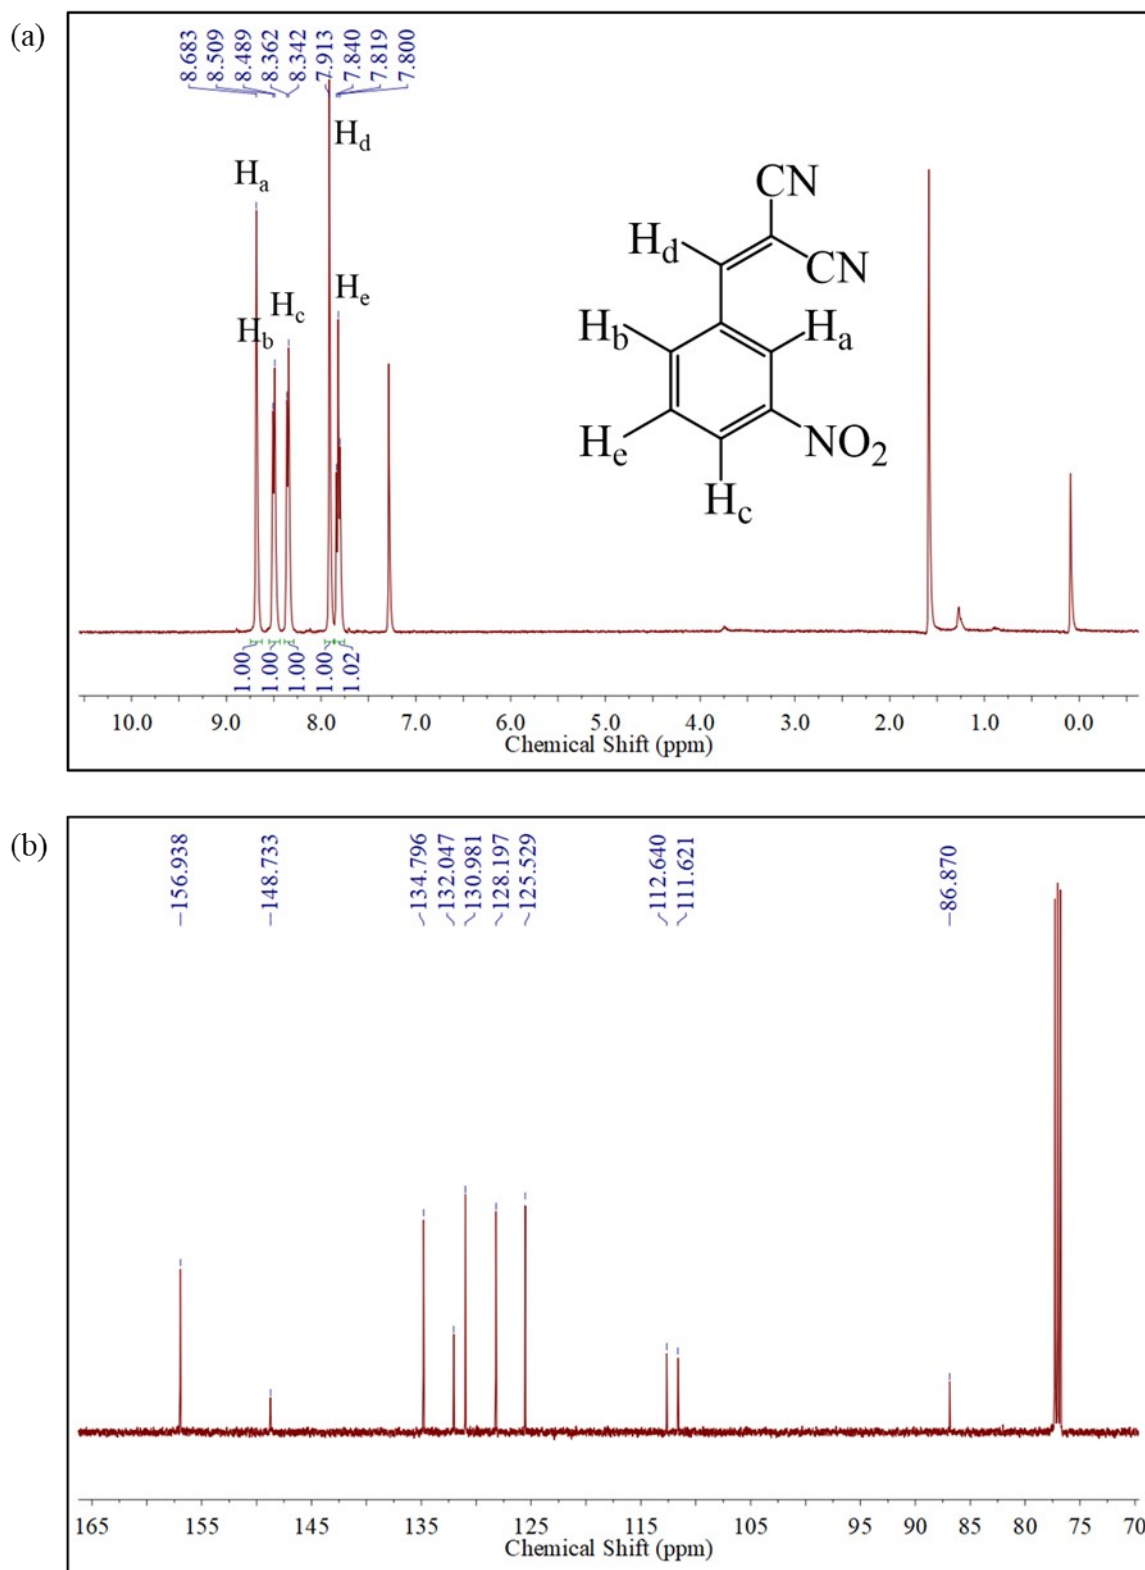

**Figure S14.** (a)  $^1\text{H}$  NMR ( $\text{CDCl}_3$ , 400 MHz) and (b)  $^{13}\text{C}$  ( $\text{CDCl}_3$ , 500 MHz) of Knoevenagel Condensation product of 3-nitrobenzaldehyde and malononitrile catalyzed by **Cd-CDA-MOF**.



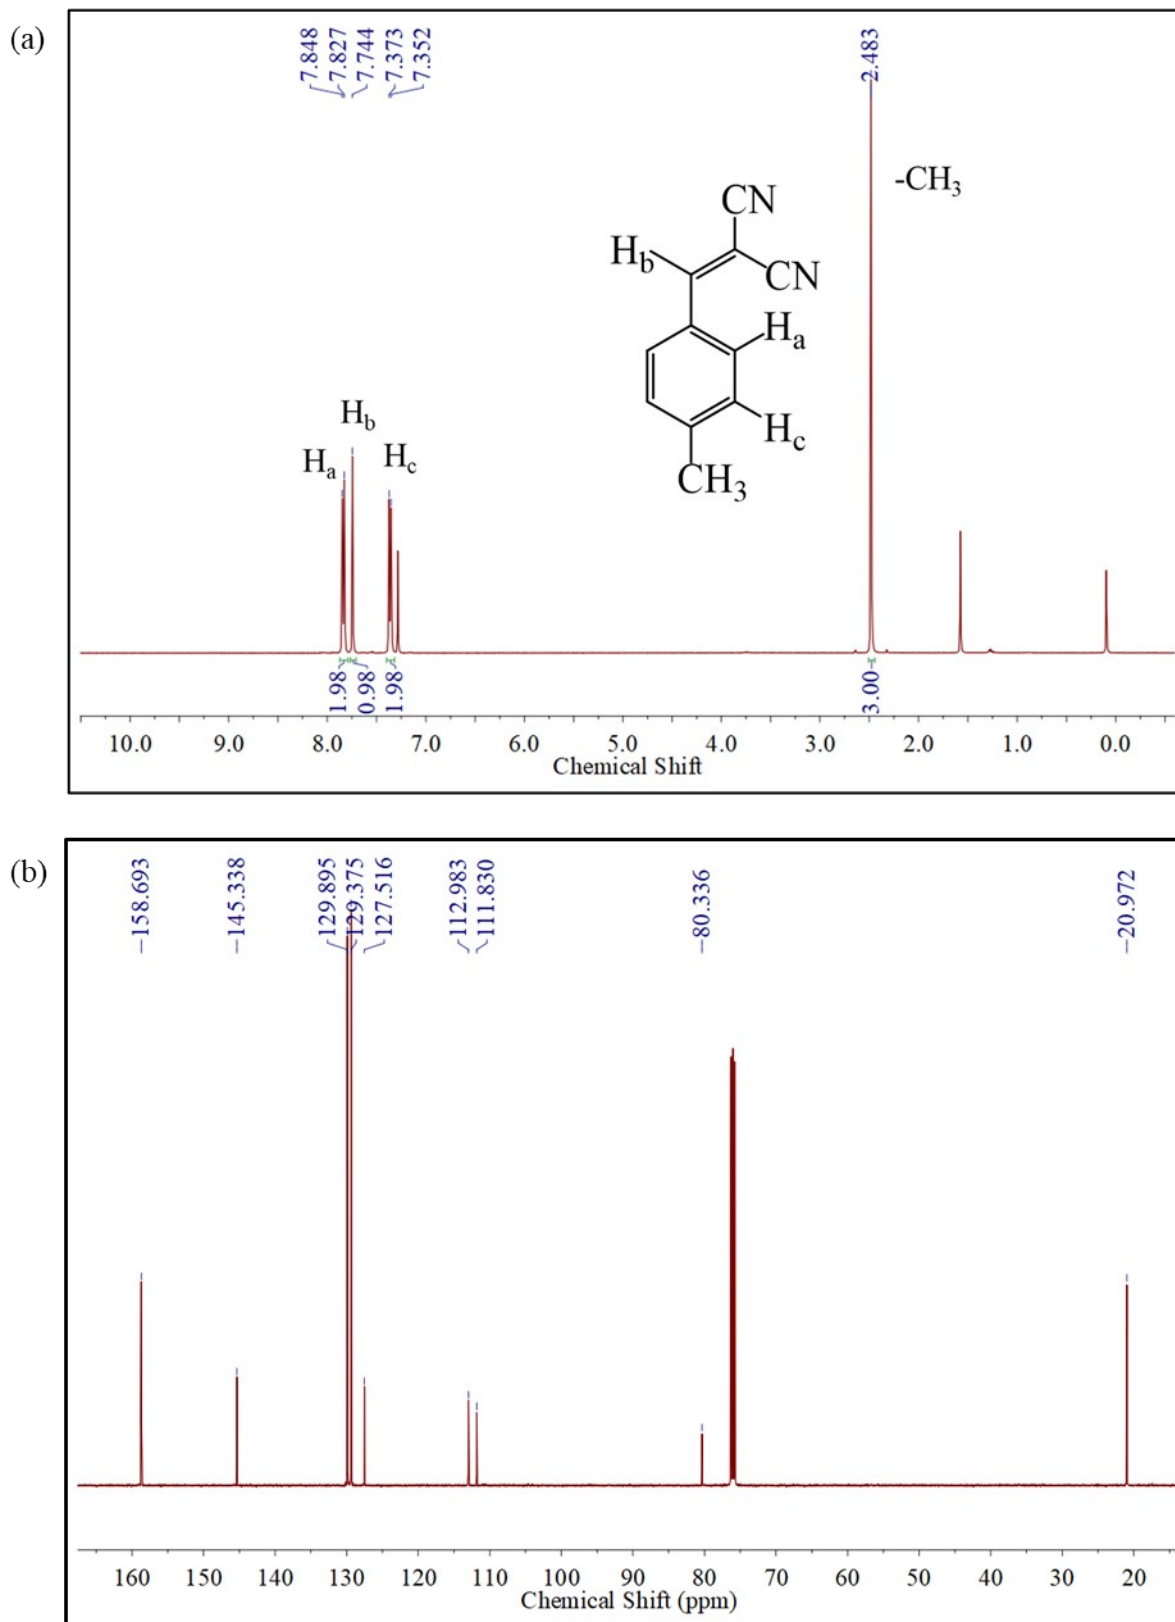

**Figure S16.** (a)  $^1\text{H}$  NMR ( $\text{CDCl}_3$ , 400 MHz) and (b)  $^{13}\text{C}$  ( $\text{CDCl}_3$ , 500 MHz) of Knoevenagel Condensation product of 4-methylbenzaldehyde and malononitrile catalyzed by **Cd-CDA-MOF**.



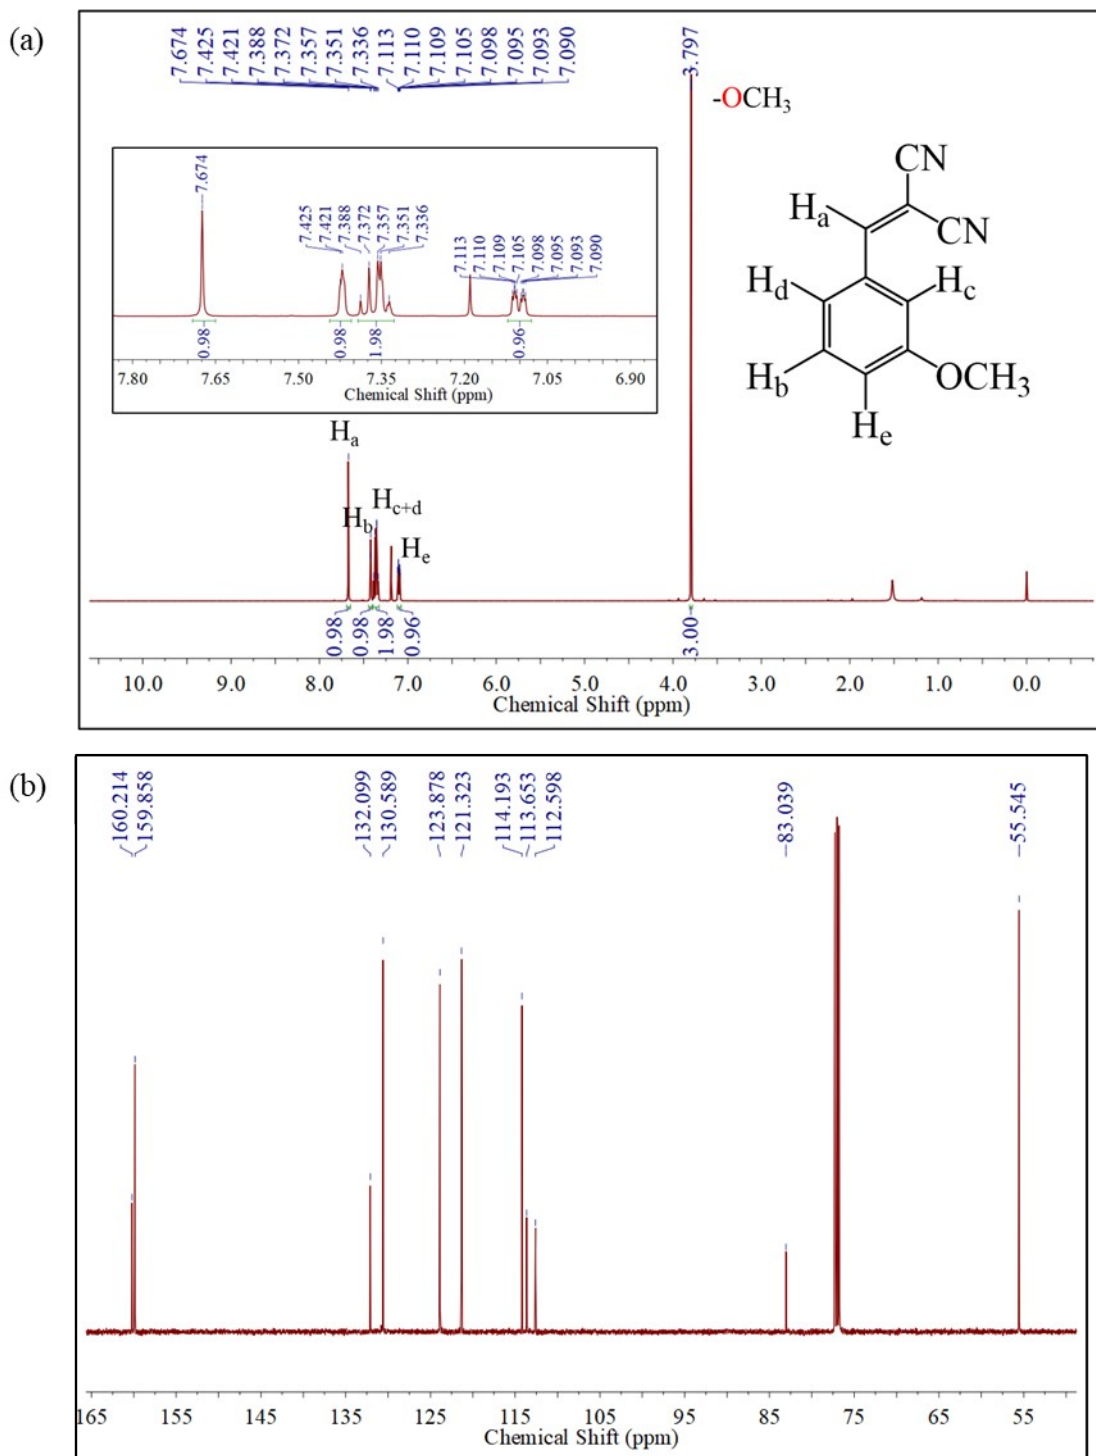

**Figure S18.** (a)  $^1H$  NMR (CDCl<sub>3</sub>, 500 MHz) and (b)  $^{13}C$  (CDCl<sub>3</sub>, 500 MHz) of Knoevenagel Condensation product of 3-methoxybenzaldehyde and malononitrile catalyzed by **Cd-CDA-MOF**.

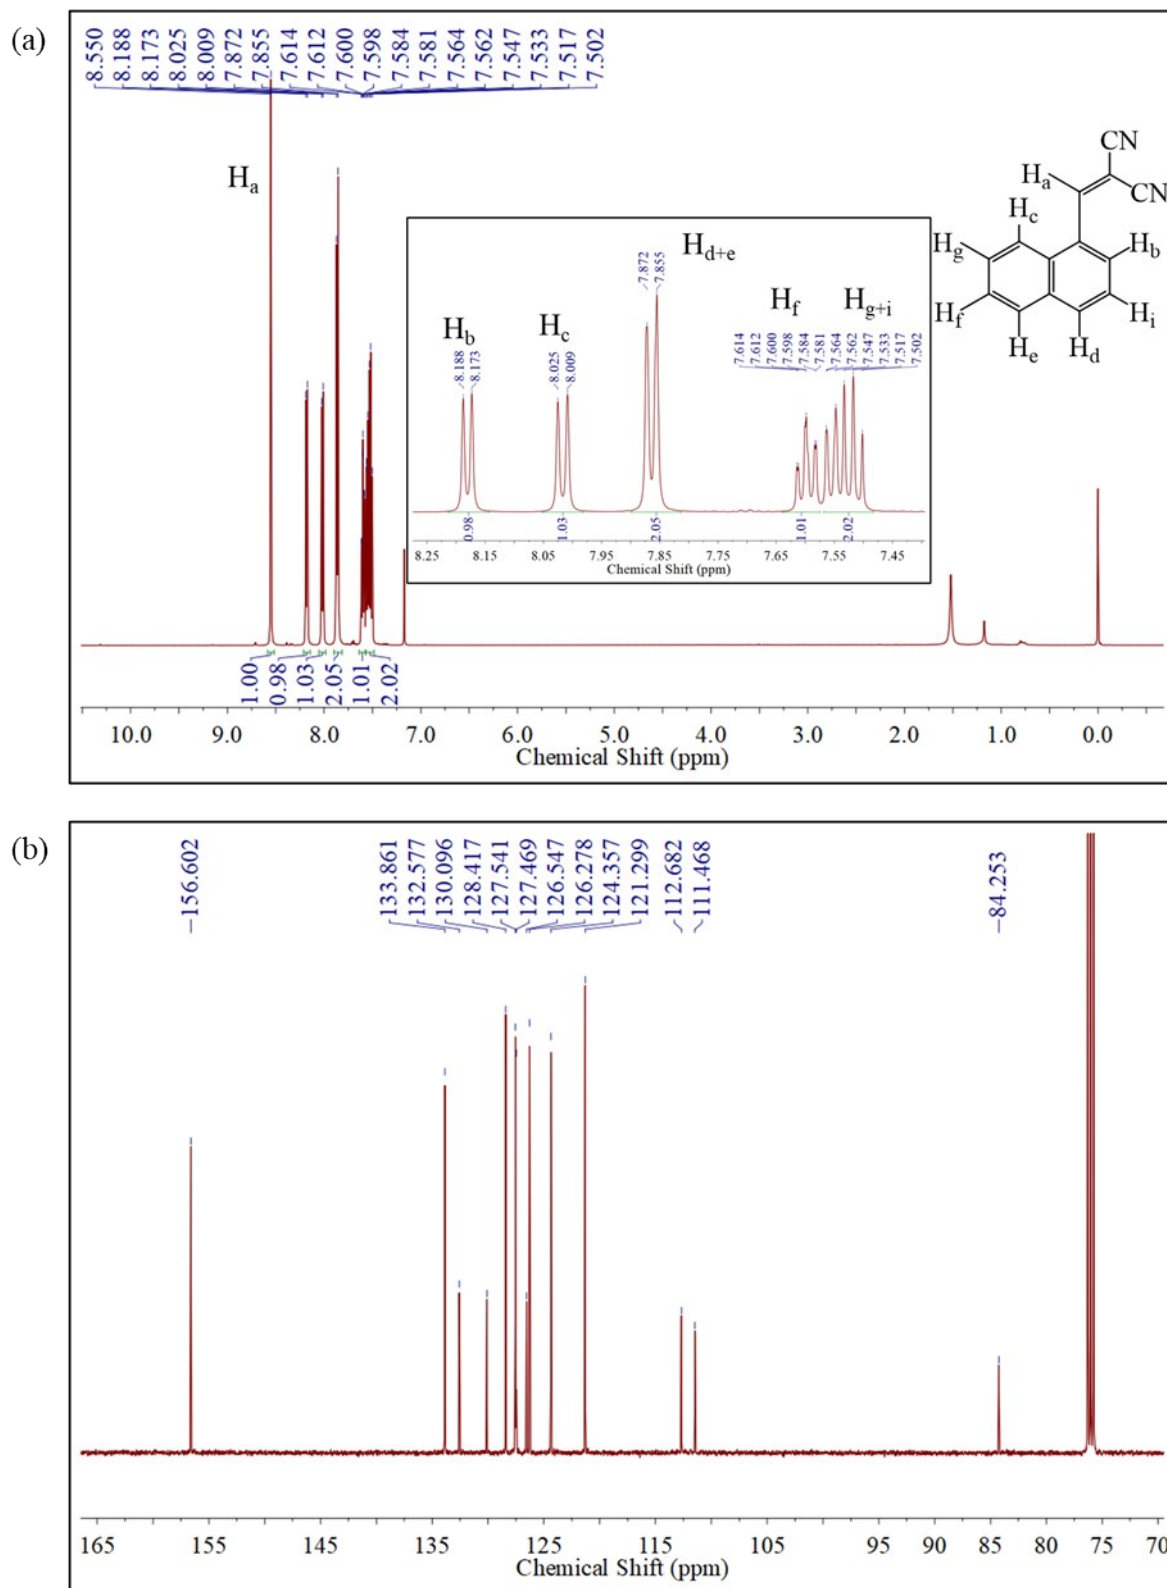

**Figure S19.** (a) <sup>1</sup>H NMR (CDCl<sub>3</sub>, 500 MHz) and (b) <sup>13</sup>C (CDCl<sub>3</sub>, 500 MHz) of Knoevenagel Condensation product of 1-naphthaldehyde and malononitrile catalyzed by Cd-CDA-MOF.

## Section S7b: Representative $^1\text{H}$ and $^{13}\text{C}$ NMR Spectra of Chan-Lam Coupling Products

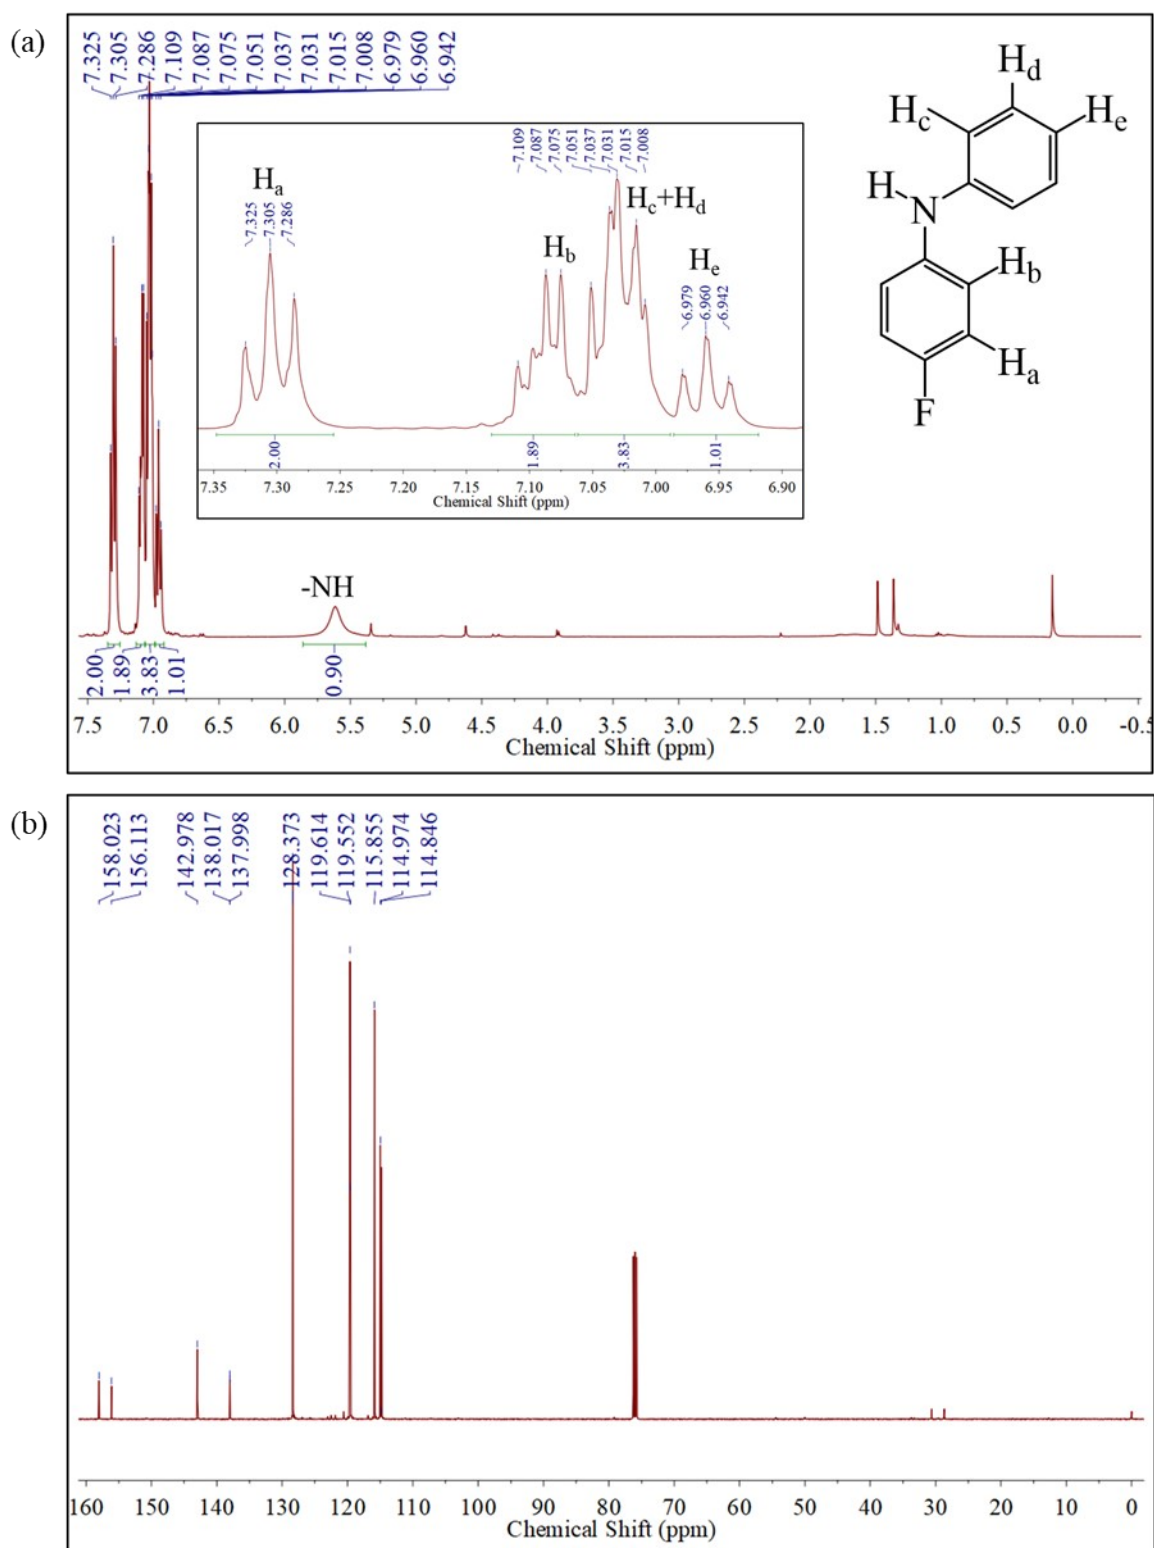

**Figure S20.** (a)  $^1\text{H}$  NMR ( $\text{CDCl}_3$ , 400 MHz) and (b)  $^{13}\text{C}$  ( $\text{CDCl}_3$ , 500 MHz) of Chan-Lam coupling product of 4-fluoroaniline and phenylboronic acid catalyzed by **Cu-CDA-MOF**.

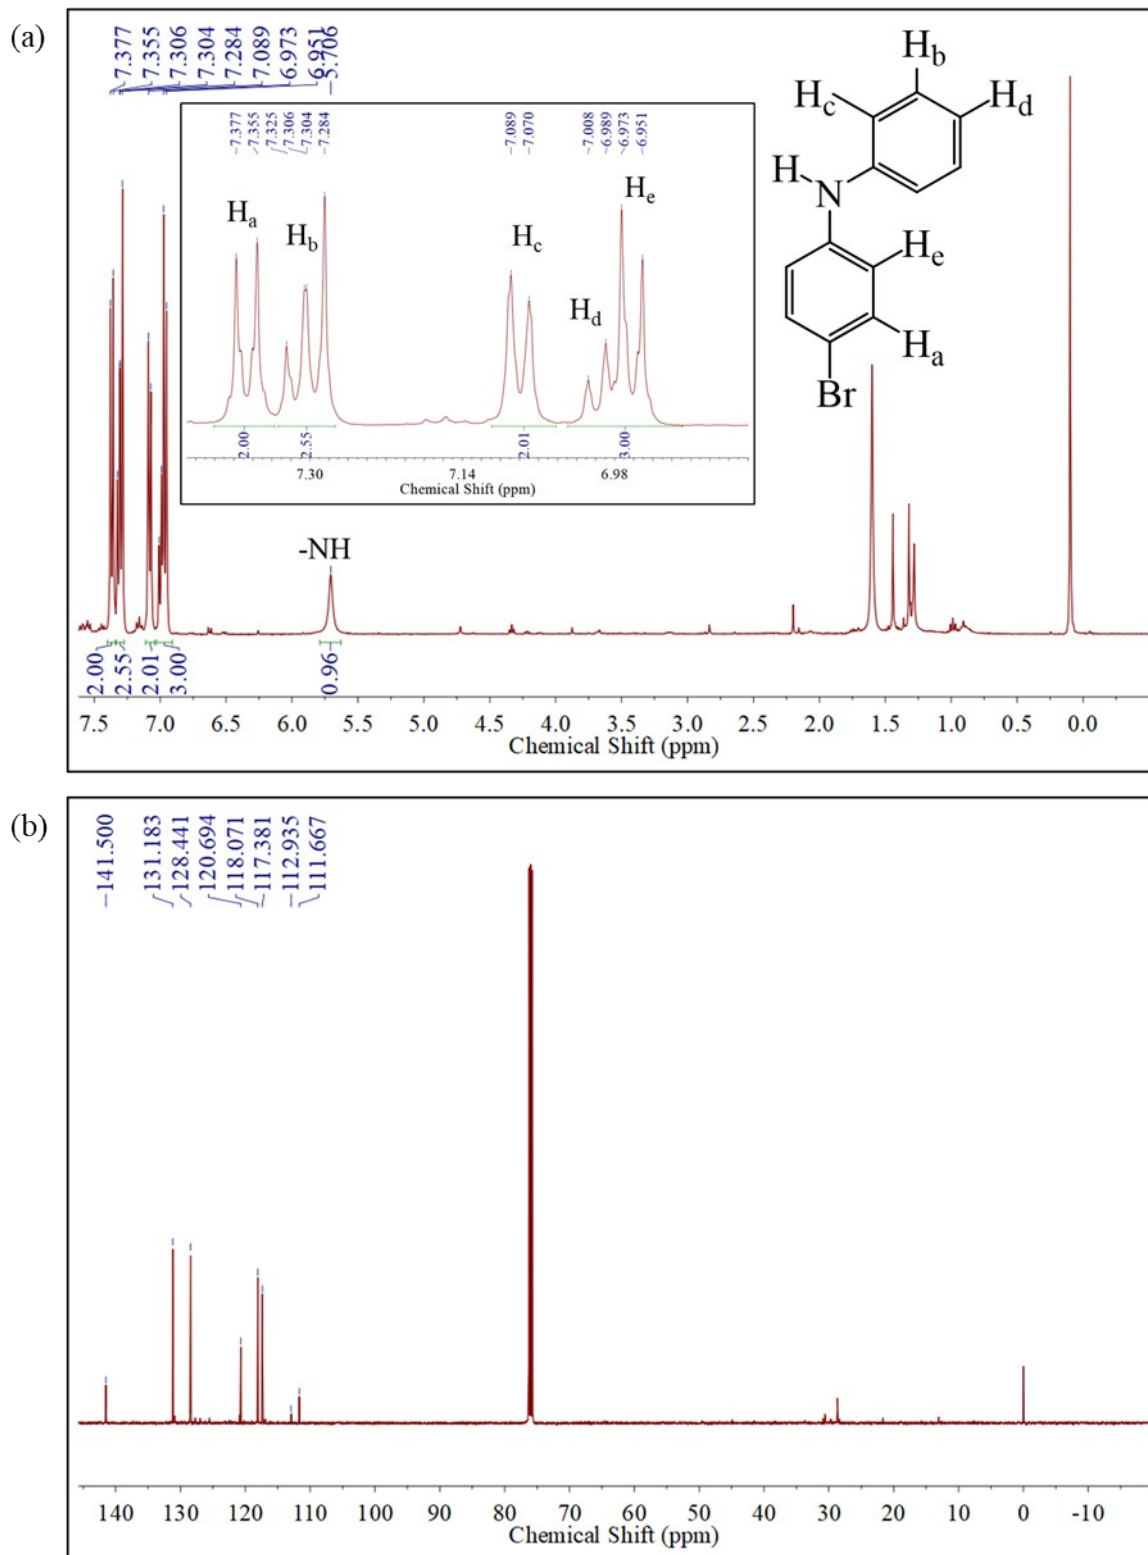



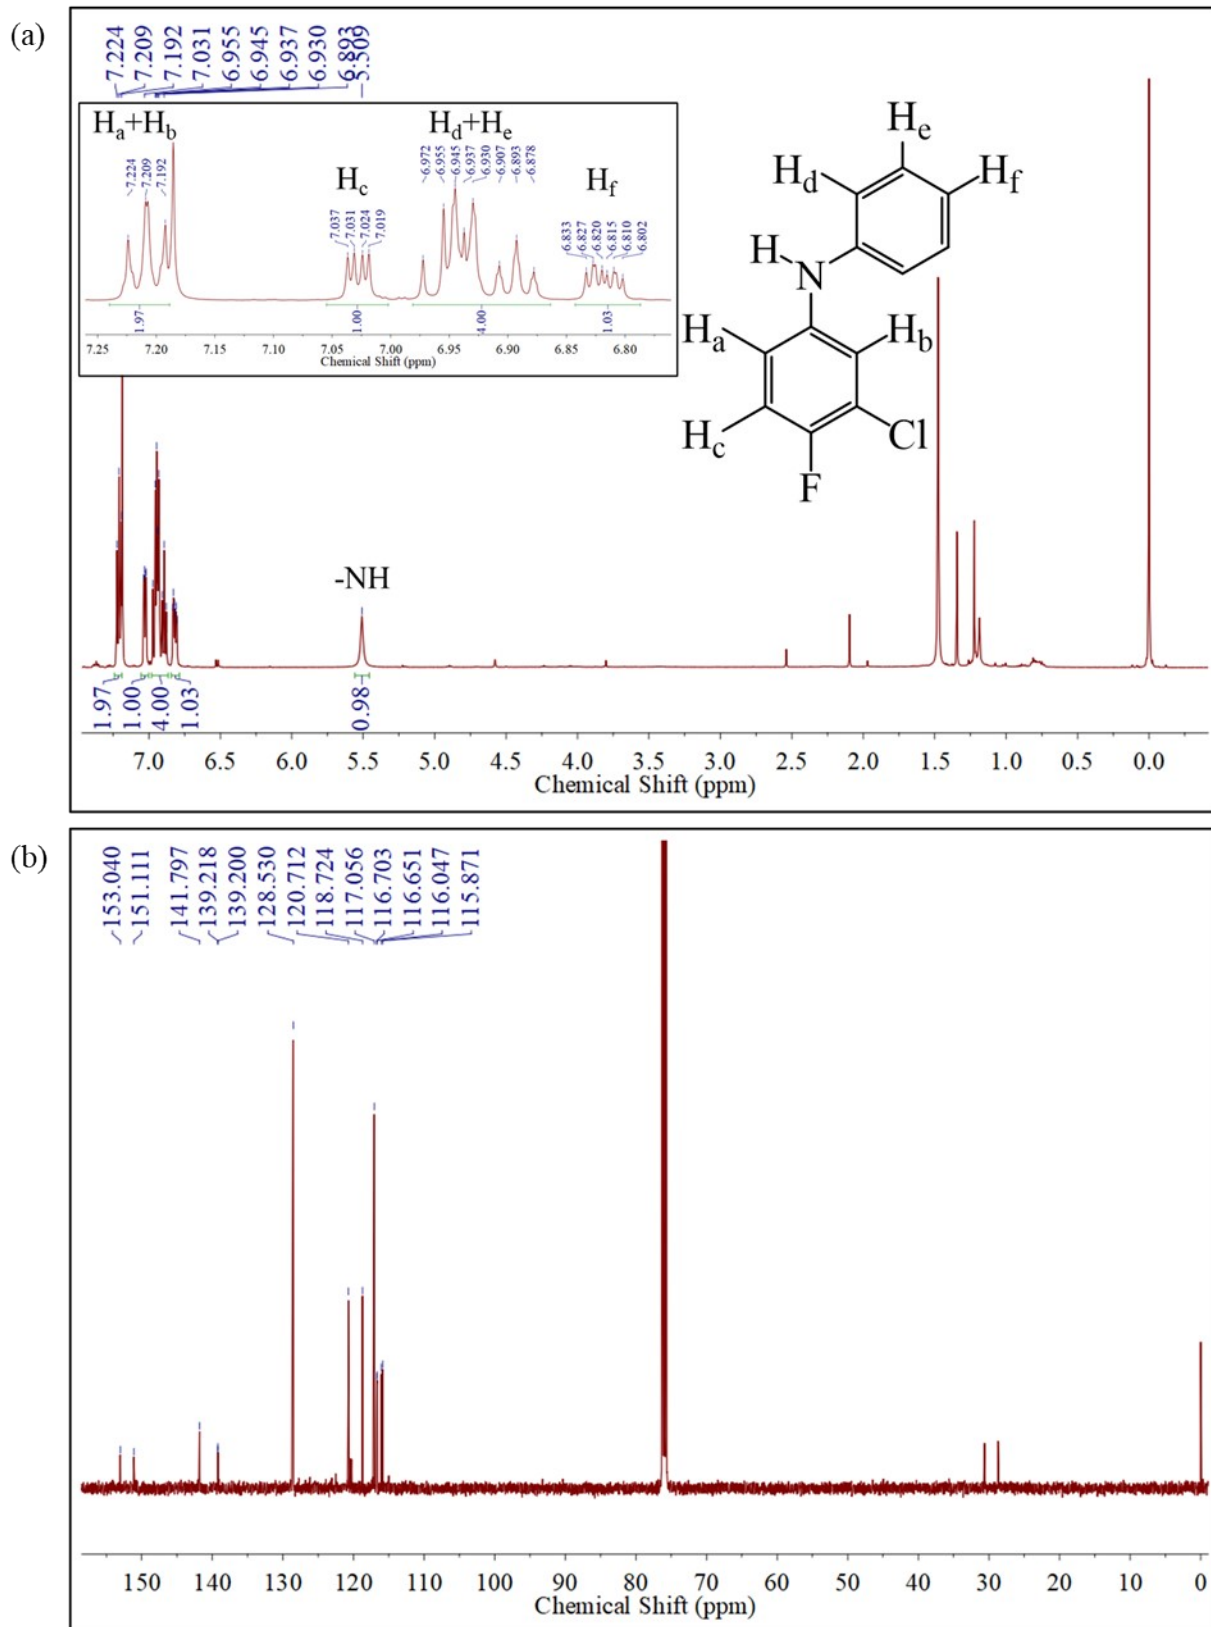

**Figure S22.** (a) <sup>1</sup>H NMR (CDCl<sub>3</sub>, 500 MHz) and (b) <sup>13</sup>C (CDCl<sub>3</sub>, 500 MHz) of Chan-Lam coupling product of 3-chloro-4-fluoroaniline and phenylboronic acid catalyzed by **Cu-CDA-MOF**.

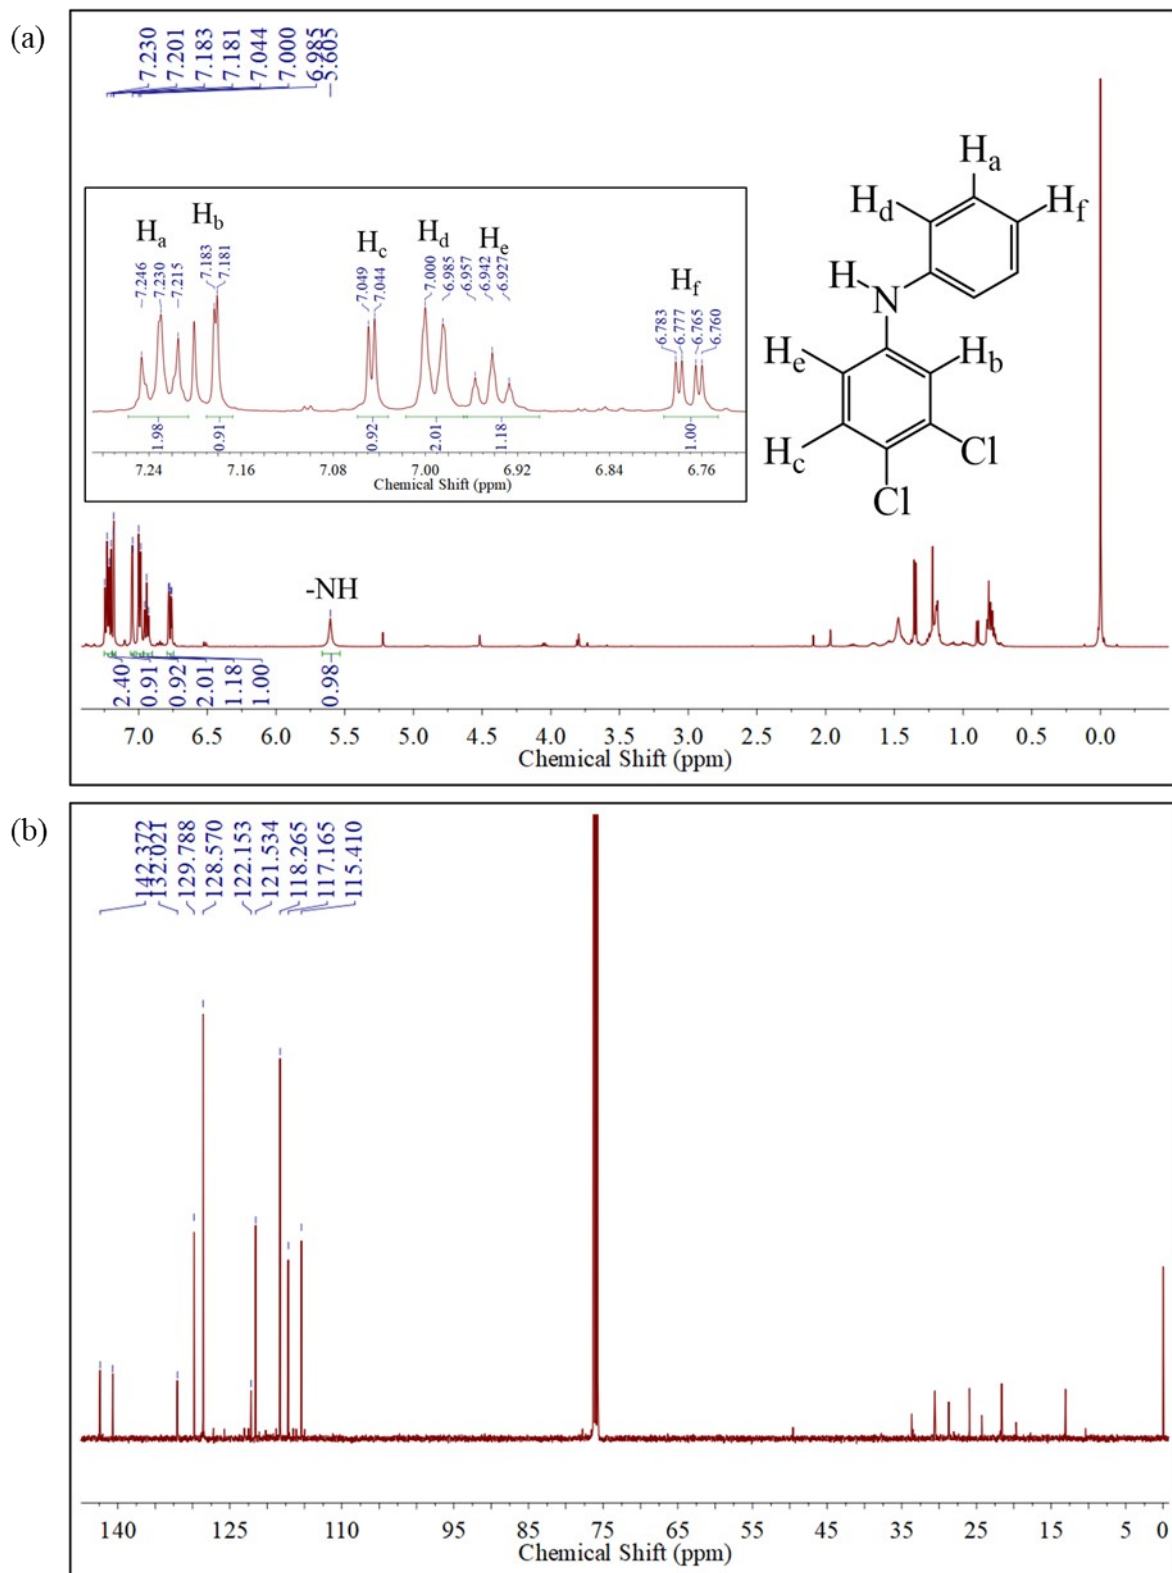

**Figure S23.** (a)  $^1H$  NMR (CDCl<sub>3</sub>, 500 MHz) and (b)  $^{13}C$  (CDCl<sub>3</sub>, 500 MHz) of Chan-Lam coupling product of 3,4-dichloroaniline and phenylboronic acid catalyzed by **Cu-CDA-MOF**.

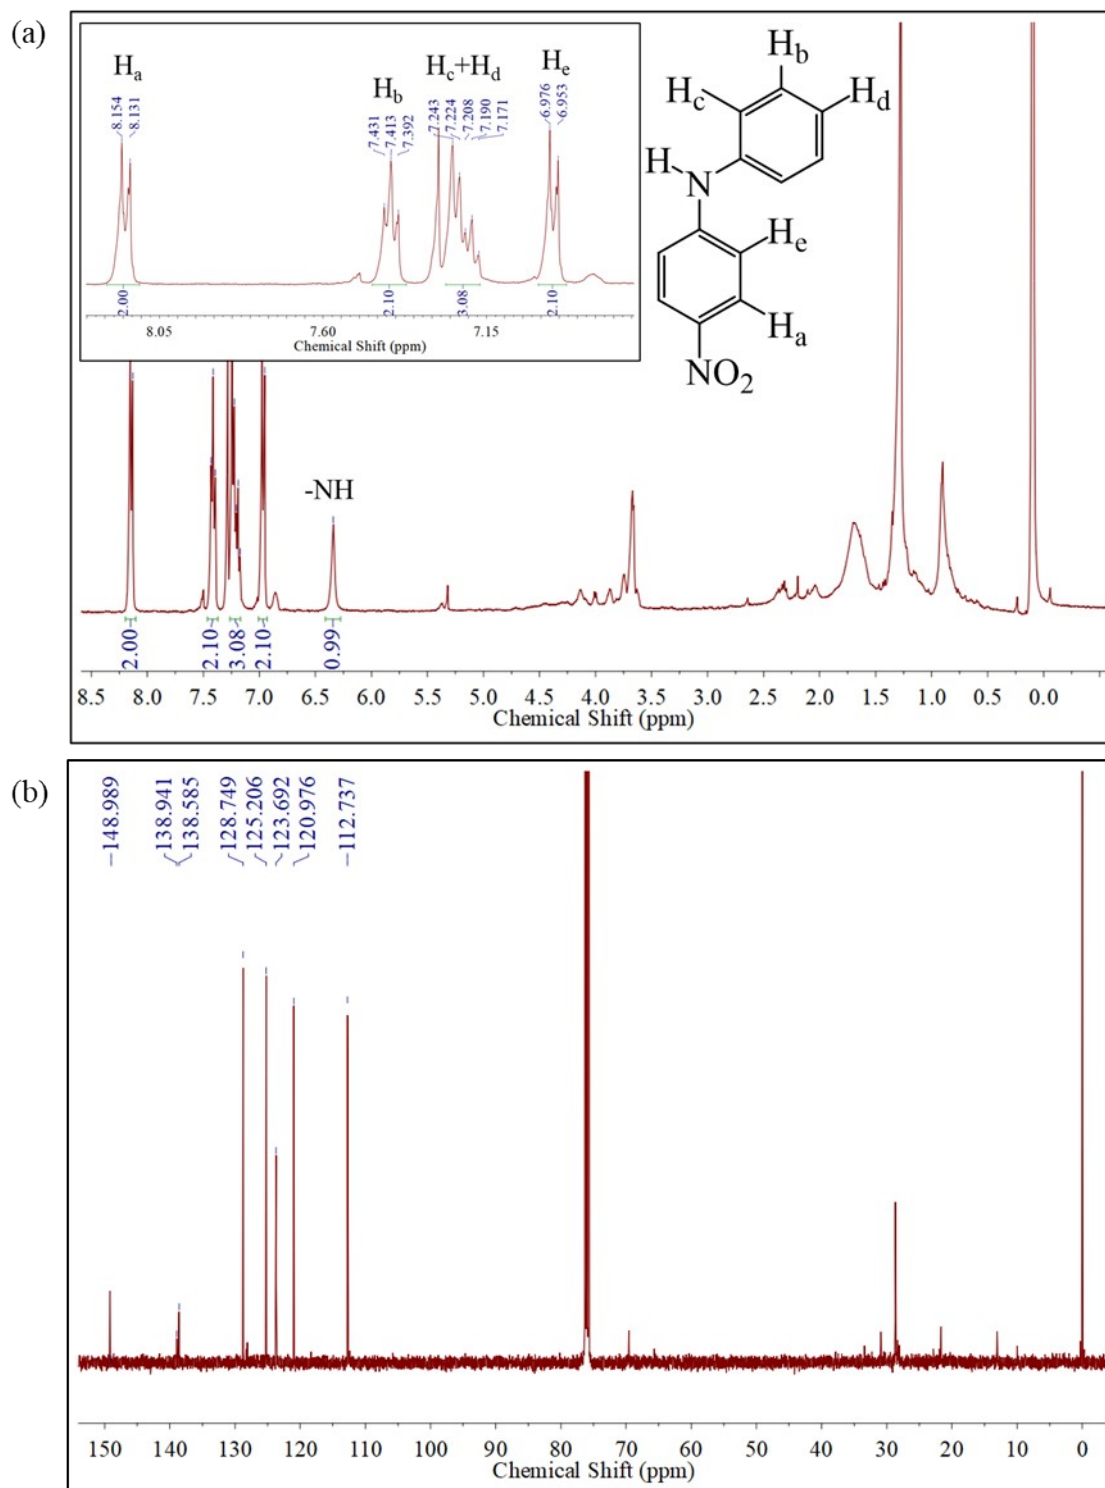

**Figure S24.** (a)  $^1\text{H}$  NMR ( $\text{CDCl}_3$ , 400 MHz) and (b)  $^{13}\text{C}$  ( $\text{CDCl}_3$ , 500 MHz) of Chan-Lam coupling product of 4-nitroaniline and phenylboronic acid catalyzed by **Cu-CDA-MOF**.

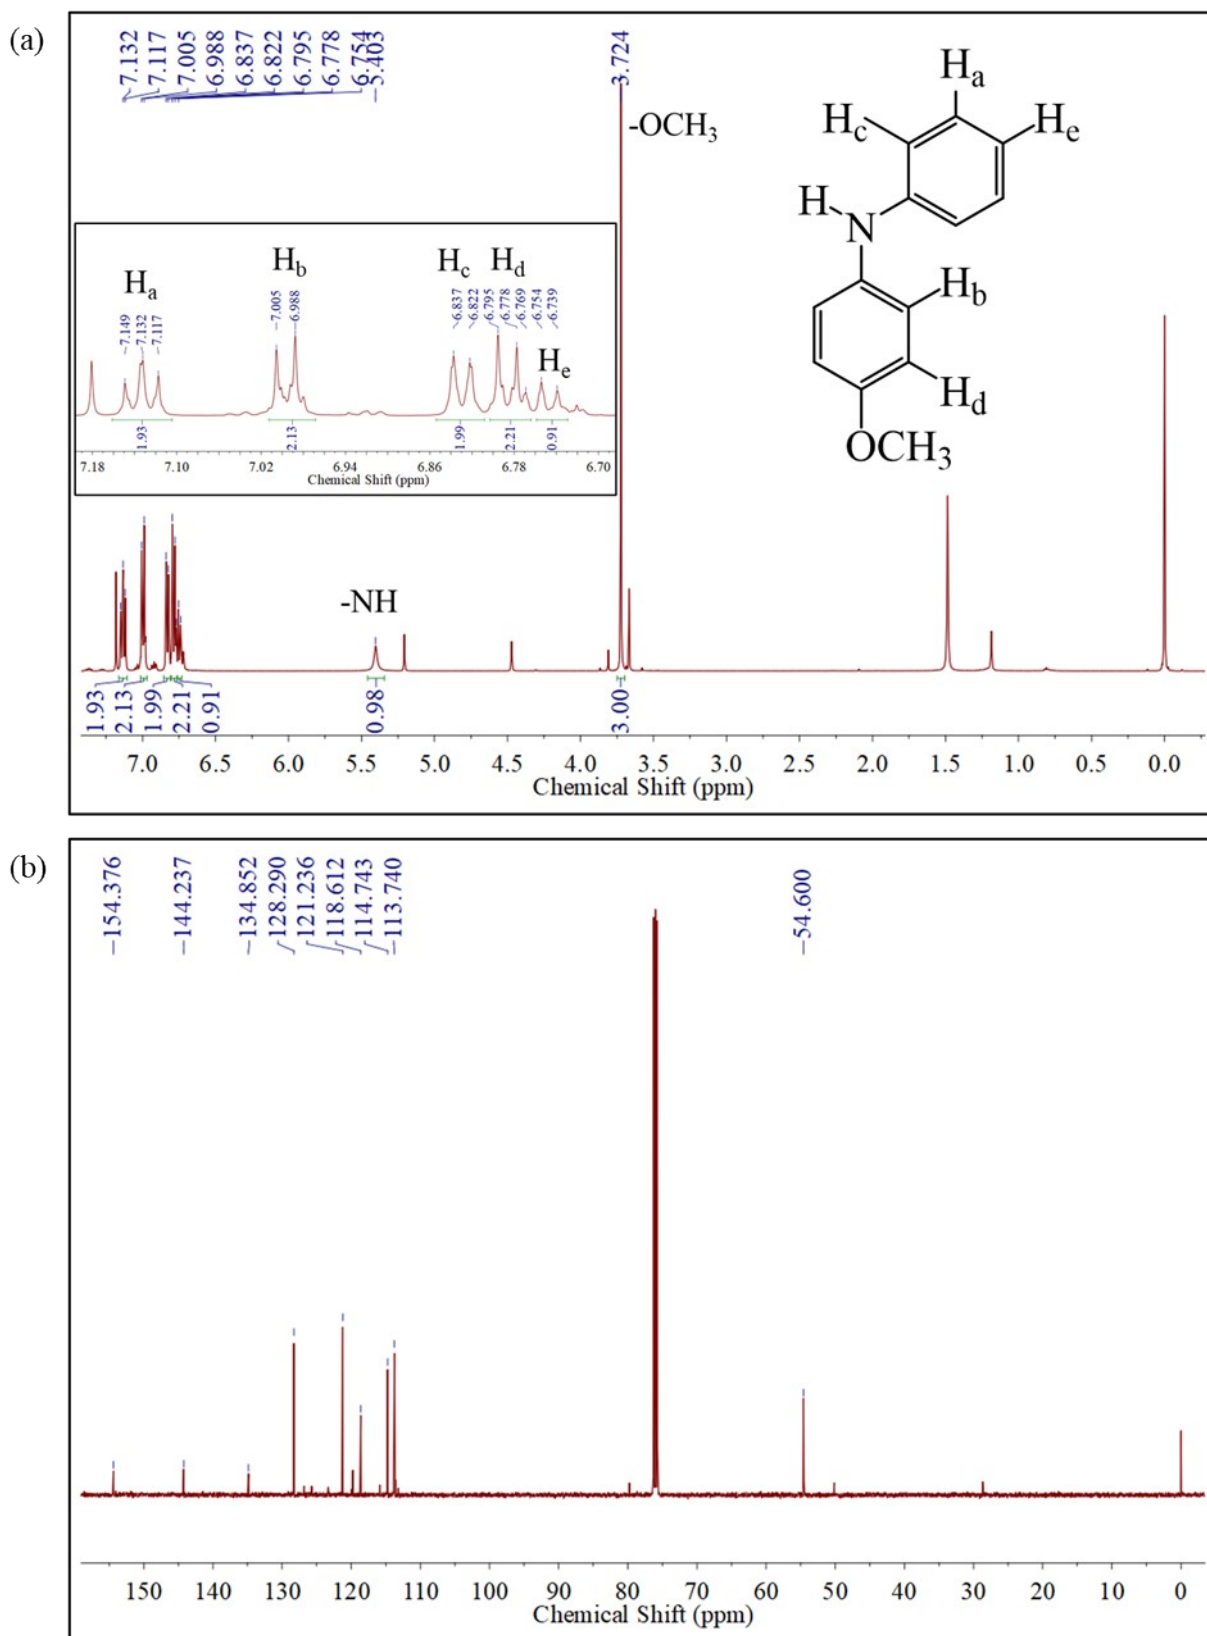

**Figure S25.** (a)  $^1H$  NMR (CDCl<sub>3</sub>, 500 MHz) and (b)  $^{13}C$  (CDCl<sub>3</sub>, 500 MHz) of Chan-Lam coupling product of 4-methoxyaniline and phenylboronic acid catalyzed by Cu-CDA-MOF.

**Section S8:** Comparison Table for Catalytic Activity and Conversion Efficiency of Cd-CDA-MOF and Cu-CDA-MOF with the recently reported MOF catalysts

**Table S3.** Comparison table of Catalytic Activity and Conversion Efficiency of Cd-CDA-MOF towards Knoevenagel Condensation Reaction

| MOFs                                                                               | Temp. (° C) | Yield (%) | TON    | TOF (h <sup>-1</sup> ) | References                                                         |
|------------------------------------------------------------------------------------|-------------|-----------|--------|------------------------|--------------------------------------------------------------------|
| Ni-MOF nanosheets                                                                  | RT          | 99 %      | -      | -                      | <i>Nano Res.</i> , <b>2019</b> , <i>12</i> , 437                   |
| TMU-41                                                                             | RT          | 98 %      | -      | -                      | <i>Polyhedron</i> , <b>2019</b> , <i>159</i> , 72.                 |
| V-Zn-MOF                                                                           | 60 °C       | 99 %      | -      | -                      | <i>ACS Sustainable Chem. Eng.</i> , <b>2021</b> , <i>9</i> , 4660. |
| Zn-MOF                                                                             | 60 °C       | 99 %      | -      | 167                    | <i>Inorg. Chem.</i> <b>2018</b> , <i>57</i> , 11157                |
| Cd-PBA                                                                             | RT          | 91 %      | -      | -                      | <i>Cryst. Growth Des.</i> <b>2018</b> , <i>18</i> , 2883.          |
| [Cd(4-btapa) <sub>2</sub> (NO <sub>3</sub> ) <sub>2</sub> ]·6H <sub>2</sub> O·2DMF | RT          | 98 %      | -      | -                      | <i>J. Am. Chem. Soc.</i> , <b>2007</b> , <i>129</i> , p. 2607.     |
| CAU-1-NH <sub>2</sub>                                                              | 40 °C       | 94 %      | -      | -                      | <i>Cryst Eng Comm</i> , <b>2017</b> , <i>19</i> , 4187.            |
| Cd-CDA-MOF                                                                         | RT          | >99       | 182.49 | 15.21                  | This work                                                          |

**Table S4.** Comparison table of Catalytic Activity and Conversion Efficiency of **Cu-CDA-MOF** towards Chan-Lam Coupling Reaction

| <b>MOFs</b>                                                            | <b>Temp. (° C)</b> | <b>Isolated Yield (%)</b> | <b>TOF (h<sup>-1</sup>)</b> | <b>References</b>                                        |
|------------------------------------------------------------------------|--------------------|---------------------------|-----------------------------|----------------------------------------------------------|
| <b>Cu<sub>2</sub>(BDC)<sub>2</sub>(BPY)-MOF</b>                        | RT                 | 85 %                      | -                           | <i>RSC Adv.</i> , <b>2017</b> , <i>7</i> , 46022.        |
| <b>Cu-MOF</b><br><b>{[Cu(4-tba)<sub>2</sub>](solvent)}<sub>n</sub></b> | 40° C              | 98 %                      | -                           | <i>Inorg. Chem. Commun</i> <b>2015</b> , <i>61</i> , 13. |
| <b>Cu(tpa)-MOF</b>                                                     | RT                 | 76 %                      | -                           | <i>Chem Cat Chem.</i> , <b>2016</b> , <i>8</i> , 2953.   |
| <b>URJC-1-MOF</b>                                                      | 60° C              | 79 %                      | -                           | <i>Chem Cat Chem.</i> , <b>2019</b> , <i>11</i> , 3376.  |
| <b>Cu(II)-complexes</b>                                                | RT                 | 64 %                      | -                           | <i>Chem Cat Chem.</i> , <b>2020</b> , <i>12</i> , 3010   |
| <b>Cu-CDA-MOF</b>                                                      | 60° C              | 70 %                      | 350                         | This work.                                               |
